# Supplementary material for: High Throughput Sequencing Identifies MicroRNAs Mediating α-Synuclein Toxicity by Targeting Neuroactive-Ligand Receptor Interaction Pathway in Early Stage of Drosophila Parkinson's Disease Model
Source: PLoS One. 2015 Sep 11;10(9):e0137432. doi: 10.1371/journal.pone.0137432 (PMC4567341; doi:10.1371/journal.pone.0137432)
Supplement: S1 Table — (XLS) [file pone.0137432.s006.xls]

## Sheet: Sheet1
Gene	Primers
U6	F:5’ TCTTGCTTCGGCAGAACATA3’
	R:5’ GATTTTGCGTGTCATCCTTG3’
dme-miR-133-3p	GSP:5’ GGGTTGGTCCCCTTCAAC3’
	R:5'GTGCGTGTCGTGGAGTCG3’
dme-miR-137-3p	GSP:5’ TGGGGGTATTGCTTGAGAATAC3’
	R:5' GTGCGTGTCGTGGAGTCG3’
dme-miR-13b-3p	GSP:5’ GGGGTATCACAGCCATTTTG3’
	R:5'GTGCGTGTCGTGGAGTCG 3’
