# Supplementary material for: High Throughput Sequencing Identifies MicroRNAs Mediating α-Synuclein Toxicity by Targeting Neuroactive-Ligand Receptor Interaction Pathway in Early Stage of Drosophila Parkinson's Disease Model
Source: PLoS One. 2015 Sep 11;10(9):e0137432. doi: 10.1371/journal.pone.0137432 (PMC4567341; doi:10.1371/journal.pone.0137432)
Supplement: S2 Table — (XLS) [file pone.0137432.s007.xls]

## Sheet: Sheet1
Genes	Primers
Nmdar2	F:5’ TTTCTGTTTCCGTTTCCCA3’
	R:5’ GCTTTTCCCTCTGTTCGCT3’
GABA-B-R3	F:5’ TTTTTTCCCGTGTTACCCA3’
	R:5’TGCTCTTCCTTCTGCTCCCT3’
GABA-B-R1	F:5’ CGAGGAGAGACCGAGCATA3’
	R:5’ TGAAAAGACGGGTGAGTGAG3’
D2R	F:5’ AGGGAGTAGGGGGGAGAAT3’
	R:5’ AAAAGGACGGCTGTTGAAA3’
DopR	F:5’ GAAGAACCAGCCCAAGAAG3’
	R:5’ CACCCAGCAGATGAGAAAA3’
