# Supplementary material for: High Throughput Sequencing Identifies MicroRNAs Mediating α-Synuclein Toxicity by Targeting Neuroactive-Ligand Receptor Interaction Pathway in Early Stage of Drosophila Parkinson's Disease Model
Source: PLoS One. 2015 Sep 11;10(9):e0137432. doi: 10.1371/journal.pone.0137432 (PMC4567341; doi:10.1371/journal.pone.0137432)
Supplement: S3 Table — (XLS) [file pone.0137432.s008.xls]

## Sheet: Sheet1
Genes	Primers
Nmdar2	F: 5’ CCCTCTAGAGGATCCCCTCACTCCTAATTCCTTCC
	R: 5’ AATTCTAGAGGAAACGATAATGGGGATGC
GABA-B-R3	F: 5’ TGCTCTAGACATTGTCCACTCTGTACAC
	R: 5’ TCTTCTAGAGGATCTTGGCTGATGCTAG
D2R	F: 5’CACTCTAGATGATTATCAACGGCGAGC
	R: 5’ CGTTCTAGAGGAATCGGAAGGAAGGTTC
