# Supplementary material for: High Throughput Sequencing Identifies MicroRNAs Mediating α-Synuclein Toxicity by Targeting Neuroactive-Ligand Receptor Interaction Pathway in Early Stage of Drosophila Parkinson's Disease Model
Source: PLoS One. 2015 Sep 11;10(9):e0137432. doi: 10.1371/journal.pone.0137432 (PMC4567341; doi:10.1371/journal.pone.0137432)
Supplement: S4 Table — (XLS) [file pone.0137432.s009.xls]

## Sheet: Raw
miRNA expression for all samples (raw). Column A: MATURE-ID, the ID of mature miRNA annotated in miRBase 21. Column B: pre-miRNA arm (5p or 3p), the position of the most abundant isomiR on pre-miRNA. Column C: PRE-ID, the pre-miRNA name. Column D: PRE-ACC, the pre-miRNA ACCESSION. Column E: MUTURE-SEED, the seed sequence of the mature miRNA. Column F: MATURE-LENGTH, the length of the mature miRNA…
miRNA information										TagCount_Mature_Alone
MATURE-ID	pre-miRNA arm (5p or 3p)	PRE-ID	PRE-ACC	MATURE-SEED	MATURE-LENGTH	MATURE-SEQ	MATURE-ACC	Most_Abundant_Seq	Is_miRBaseMature_Most_Abundant_Seq	control1	PD1	control 2	PD2	control3	PD3
dme-bantam-5p	5p	dme-bantam	MI0000387	CGGUUU	23	CCGGUUUUCGAUUUGGUUUGACU	MIMAT0020823	CCGGTTTTCGATTTGGTTTGACT	Yes	714	759	191	908	258	667
dme-bantam-3p	3p	dme-bantam	MI0000387	GAGAUC	23	UGAGAUCAUUUUGAAAGCUGAUU	MIMAT0000365	TGAGATCATTTTGAAAGCTGAT	No	516	418	166	524	209	357
dme-let-7-5p	5p	dme-let-7	MI0000416	GAGGUA	21	UGAGGUAGUAGGUUGUAUAGU	MIMAT0000396	TGAGGTAGTAGGTTGTATAGT	Yes	6338	6387	5138	6845	4650	3925
dme-miR-1-3p	3p	dme-mir-1	MI0000116	GGAAUG	22	UGGAAUGUAAAGAAGUAUGGAG	MIMAT0000105	TGGAATGTAAAGAAGTATGGAG	Yes	25908	17712	19391	28771	18452	14872
dme-miR-10-5p	5p	dme-mir-10	MI0000130	CCCUGU	22	ACCCUGUAGAUCCGAAUUUGUU	MIMAT0000115	ACCCTGTAGATCCGAATTTGTT	Yes	6340	5287	1577	5985	1896	4693
dme-miR-10-3p	3p	dme-mir-10	MI0000130	AAAUUC	23	CAAAUUCGGUUCUAGAGAGGUUU	MIMAT0012531	CAAATTCGGTTCTAGAGAGGTT	No	44	37	9	34	14	30
dme-miR-100-5p	5p	dme-mir-100	MI0000378	ACCCGU	22	AACCCGUAAAUCCGAACUUGUG	MIMAT0000357	AACCCGTAAATCCGAACTTGT	No	210	197	75	279	91	181
dme-miR-1000-5p	5p	dme-mir-1000	MI0005862	UAUUGU	21	AUAUUGUCCUGUCACAGCAGU	MIMAT0005520	ATATTGTCCTGTCACAGCAG	No	341	348	366	491	342	225
dme-miR-1000-3p	3p	dme-mir-1000	MI0005862	UGCUGG	22	CUGCUGGGUCGGGGCAUUAACA	MIMAT0020900	CTGCTGGGTCGGGGCATTAACA	Yes	14	10	11	14	9	15
dme-miR-1001-5p	5p	dme-mir-1001	MI0005863	GGGUAA	21	UGGGUAAACUCCCAAGGAUCA	MIMAT0005521	TGGGTAAACTCCCAAGGATCAGG	No	2				3
dme-miR-1003-3p	3p	dme-mir-1003	MI0005864	CUCACA	22	UCUCACAUUUACAUAUUCACAG	MIMAT0005016	TCTCACATTTACATATTCACA	No	5	3	3	7	3	3
dme-miR-1004-5p	5p	dme-mir-1004	MI0005865	UUGGGG	23	GUUGGGGGACAUUGAUCUCGGAG	MIMAT0032027	GTTGGGGGACATTGATCTCGGAGA	No	2	3	3	6		4
dme-miR-1004-3p	3p	dme-mir-1004	MI0005865	CUCACA	22	UCUCACAUCACUUCCCUCACAG	MIMAT0005017	TCTCACATCACTTCCCTCACAG	Yes	66	63	29	60	15	58
dme-miR-1006-3p	3p	dme-mir-1006	MI0005867	AAAUUC	23	UAAAUUCGAUUUCUUAUUCAUAG	MIMAT0005019	TAAATTCGATTTCTTATTCATAG	Yes	11	14	2	10	5	14
dme-miR-1008-5p	5p	dme-mir-1008	MI0005869	UAAAUA	21	GUAAAUAUCUAAAGUUGAACU	MIMAT0032028	GTAAATATCTAAAGTTGAACT	Yes	4	8	2	6		4
dme-miR-1010-5p	5p	dme-mir-1010	MI0005871	AAGUGG	20	UAAGUGGUGUAGAUGAAACA	MIMAT0020905	GTAAGTGGTGTAGATGAAACA	No			2	4	2
dme-miR-1010-3p	3p	dme-mir-1010	MI0005871	UUCACC	24	UUUCACCUAUCGUUCCAUUUGCAG	MIMAT0005023	TTTCACCTATCGTTCCATTTGC	No	40	15	4	36	14	32
dme-miR-1012-5p	5p	dme-mir-1012	MI0005873	GGGUAG	21	UGGGUAGAACUUUGAUUAAUA	MIMAT0020906	GTGGGTAGAACTTTGATTAAT	No	3	5	2	3	3	3
dme-miR-1012-3p	3p	dme-mir-1012	MI0005873	UAGUCA	23	UUAGUCAAAGAUUUUCCCCAUAG	MIMAT0005025	TTAGTCAAAGATTTTCCCCATAG	Yes	25	16	9	24	6	11
dme-miR-1016-3p	3p	dme-mir-1016	MI0005877	UCACCU	21	UUCACCUCUCUCCAUACUUAG	MIMAT0005029	AGTTCACCTCTCTCCAT	No	2
dme-miR-1017-3p	3p	dme-mir-1017	MI0005878	AAAGCU	23	GAAAGCUCUACCCAAACUCAUCC	MIMAT0005030	GAAAGCTCTACCCAAACTCATCC	Yes	17	8	4	18	4	10
dme-miR-11-5p	5p	dme-mir-11	MI0000131	AAGAAC	22	CAAGAACUUUCUCUGUGACCCG	MIMAT0020793	CAAGAACTTTCTCTGTGACCCG	Yes	193	150	55	150	63	134
dme-miR-11-3p	3p	dme-mir-11	MI0000131	AUCACA	21	CAUCACAGUCUGAGUUCUUGC	MIMAT0000116	CATCACAGTCTGAGTTCTTGCT	No	1512	1238	1132	1660	1028	1198
dme-miR-12-5p	5p	dme-mir-12	MI0000132	GAGUAU	23	UGAGUAUUACAUCAGGUACUGGU	MIMAT0000117	TGAGTATTACATCAGGTACTGGT	Yes	266	263	103	327	152	233
dme-miR-124-5p	5p	dme-mir-124	MI0000373	GUAUCC	23	GGUAUCCACUGUAGGCCUAUAUG	MIMAT0020813	GGTATCCACTGTAGGCCTATATG	Yes	20	8	4	10	7	10
dme-miR-124-3p	3p	dme-mir-124	MI0000373	AAGGCA	23	UAAGGCACGCGGUGAAUGCCAAG	MIMAT0000351	TAAGGCACGCGGTGAATGCC	No		2				2
dme-miR-125-5p	5p	dme-mir-125	MI0000417	CCCUGA	22	UCCCUGAGACCCUAACUUGUGA	MIMAT0000397	TCCCTGAGACCCTAACTTGTG	No	76	47	23	84	28	74
dme-miR-125-3p	3p	dme-mir-125	MI0000417	CAAGUU	21	ACAAGUUUUGAUCUCCGGUAU	MIMAT0020831	ACAAGTTTTGATCTCCGGTAT	Yes	93	91	65	137	82	75
dme-miR-133-5p	5p	dme-mir-133	MI0000362	GCUGGU	23	AGCUGGUUGACAUCGGGUCAGAU	MIMAT0020806	AGCTGGTTGACATCGGGTCAGAT	Yes	18	21	9	20	17	11
dme-miR-133-3p	3p	dme-mir-133	MI0000362	UGGUCC	22	UUGGUCCCCUUCAACCAGCUGU	MIMAT0000340	TTGGTCCCCTTCAACCAGCTG	No	8129	9079	5421	9009	4873	7449
dme-miR-137-5p	5p	dme-mir-137	MI0005849	CGUGUA	23	ACGUGUAUGCUCGUAGCUAUAAC	MIMAT0020888	ACGTGTATGCTCGTAGCTATAAC	Yes	2	2
dme-miR-137-3p	3p	dme-mir-137	MI0005849	AUUGCU	22	UAUUGCUUGAGAAUACACGUAG	MIMAT0005507	TATTGCTTGAGAATACACGTAG	Yes	220	231	126	246	150	203
dme-miR-13a-5p	5p	dme-mir-13a	MI0000133	UCCUCA	22	CUCCUCAAAGGGUUGUGAAAUG	MIMAT0020795	CTCCTCAAAGGGTTGTGAAATG	Yes		2		6		7
dme-miR-13a-3p	3p	dme-mir-13a	MI0000133	AUCACA	22	UAUCACAGCCAUUUUGAUGAGU	MIMAT0000118	TATCACAGCCATTTTGATGAGTT	No	9	8	2	8	5	9
dme-miR-13b-1-5p	5p	dme-mir-13b-1	MI0000134	CGUUAA	25	UCGUUAAAAUGUUUGUGAACUUAUG	MIMAT0020796	TCGTTAAAATGTTTGTGAACT	No		2				2
dme-miR-13b-3p	3p	dme-mir-13b-1	MI0000134	AUCACA	22	UAUCACAGCCAUUUUGACGAGU	MIMAT0000119	TATCACAGCCATTTTGACGAGT	Yes	71	100	43	103	51	84
dme-miR-13b-3p	3p	dme-mir-13b-2	MI0000135	AUCACA	22	UAUCACAGCCAUUUUGACGAGU	MIMAT0000119	TATCACAGCCATTTTGACGAGT	Yes	71	100	43	103	51	84
dme-miR-14-5p	5p	dme-mir-14	MI0000136	GGAGCG	22	GGGAGCGAGACGGGGACUCACU	MIMAT0020798	GGGAGCGAGACGGGGACTCACT	Yes	674	566	254	506	206	411
dme-miR-14-3p	3p	dme-mir-14	MI0000136	CAGUCU	22	UCAGUCUUUUUCUCUCUCCUAU	MIMAT0000120	TCAGTCTTTTTCTCTCTCCT	No	4230	3082	1853	4190	1848	3042
dme-miR-184-5p	5p	dme-mir-184	MI0000354	CUUAUC	21	CCUUAUCAUUCUCUCGCCCCG	MIMAT0000330	CCTTATCATTCTCTCGCCCCGT	No	4				2
dme-miR-184-3p	3p	dme-mir-184	MI0000354	GGACGG	22	UGGACGGAGAACUGAUAAGGGC	MIMAT0000331	TGGACGGAGAACTGATAAGG	No	122213	106713	62601	134297	63905	107780
dme-miR-190-5p	5p	dme-mir-190	MI0005808	GAUAUG	24	AGAUAUGUUUGAUAUUCUUGGUUG	MIMAT0005467	AGATATGTTTGATATTCTTGGTTG	Yes	1148	2390	777	592	869	1105
dme-miR-190-3p	3p	dme-mir-190	MI0005808	CCAGGA	22	CCCAGGAAUCAAACAUAUUAUU	MIMAT0020848	CCCAGGAATCAAACATATTATT	Yes	4	9	2	7	2	4
dme-miR-193-5p	5p	dme-mir-193	MI0005809	UGGGAU	22	UUGGGAUUUUUUAGAUCAGCAG	MIMAT0020849	GGTTGGGATTTTTTAGATCAGC	No	11	10	6	21	9	5
dme-miR-193-3p	3p	dme-mir-193	MI0005809	ACUGGC	22	UACUGGCCUACUAAGUCCCAAC	MIMAT0005468	TACTGGCCTACTAAGTCCCAAC	Yes	9	15	8	17	5	4
dme-miR-210-5p	5p	dme-mir-210	MI0000376	GCUGCU	23	AGCUGCUGGCCACUGCACAAGAU	MIMAT0020816	AGCTGCTGGCCACTGCACAAGA	No	3	2	2	3		3
dme-miR-210-3p	3p	dme-mir-210	MI0000376	UUGUGC	23	CUUGUGCGUGUGACAGCGGCUAU	MIMAT0000355	CTTGTGCGTGTGACAGCGGCT	No	904	867	756	1019	662	805
dme-miR-219-5p	5p	dme-mir-219	MI0000358	GAUUGU	21	UGAUUGUCCAAACGCAAUUCU	MIMAT0000335	TGATTGTCCAAACGCAATTCT	Yes	17	21	23	33	22	19
dme-miR-2500-3p	3p	dme-mir-2500	MI0011589	GAUUUU	22	GGAUUUUGUGUGUGGACCUCAG	MIMAT0012215	GGATTTTGTGTGTGGACCTCAG	Yes	3	2
dme-miR-252-5p	5p	dme-mir-252	MI0005858	UAAGUA	22	CUAAGUACUAGUGCCGCAGGAG	MIMAT0005516	CTAAGTACTAGTGCCGCAGGAG	Yes	704	681	383	821	507	685
dme-miR-252-3p	3p	dme-mir-252	MI0005858	CCUGCU	22	UCCUGCUGCCCAAGUGCUUAUU	MIMAT0020896	TCCTGCTGCCCAAGTGCTTATT	Yes	11	6	6	7	5	6
dme-miR-263a-5p	5p	dme-mir-263a	MI0000343	AUGGCA	24	AAUGGCACUGGAAGAAUUCACGGG	MIMAT0000319	AATGGCACTGGAAGAATTCAC	No	6962	5711	1003	5281	2003	5912
dme-miR-263b-5p	5p	dme-mir-263b	MI0000383	UUGGCA	21	CUUGGCACUGGGAGAAUUCAC	MIMAT0000362	CTTGGCACTGGGAGAATTCAC	Yes	494	489	221	493	236	479
dme-miR-274-5p	5p	dme-mir-274	MI0000355	UUGUGA	23	UUUGUGACCGACACUAACGGGUA	MIMAT0000332	TTTGTGACCGACACTAACGGGT	No	3240	3256	1556	4796	1669	2953
dme-miR-275-5p	5p	dme-mir-275	MI0000356	GCGCUA	23	CGCGCUAAUCAGUGACCGGGGCU	MIMAT0020801	CGCGCTAATCAGTGACCGGGGCT	Yes	74	73	34	59	28	44
dme-miR-275-3p	3p	dme-mir-275	MI0000356	CAGGUA	23	UCAGGUACCUGAAGUAGCGCGCG	MIMAT0000333	TCAGGTACCTGAAGTAGCGCGC	No	48	63	30	46	47	46
dme-miR-276a-3p	3p	dme-mir-276a	MI0000359	AGGAAC	22	UAGGAACUUCAUACCGUGCUCU	MIMAT0000337	TAGGAACTTCATACCGTGCTCT	Yes	30502	26736	23493	39413	34647	21148
dme-miR-276b-3p	3p	dme-mir-276b	MI0000375	AGGAAC	22	UAGGAACUUAAUACCGUGCUCU	MIMAT0000354	TAGGAACTTAATACCGTGCTCT	Yes	4239	4182	3664	5665	5727	3180
dme-miR-277-5p	5p	dme-mir-277	MI0000360	GUGUCA	21	CGUGUCAGGAGUGCAUUUGCA	MIMAT0020804	CGTGTCAGGAGTGCATTTGCA	Yes	37	44	6	31	26	32
dme-miR-277-3p	3p	dme-mir-277	MI0000360	AAAUGC	23	UAAAUGCACUAUCUGGUACGACA	MIMAT0000338	TAAATGCACTATCTGGTACGAC	No	886	714	219	918	375	688
dme-miR-278-5p	5p	dme-mir-278	MI0000361	CGGAUG	23	CCGGAUGAUGGUUCACAACGACC	MIMAT0020805	CCGGATGATGGTTCACAACGACC	Yes	76	75	31	59	27	66
dme-miR-278-3p	3p	dme-mir-278	MI0000361	CGGUGG	22	UCGGUGGGACUUUCGUCCGUUU	MIMAT0000339	TCGGTGGGACTTTCGTCCGTTT	Yes	509	562	926	940	885	291
dme-miR-279-3p	3p	dme-mir-279	MI0000363	GACUAG	22	UGACUAGAUCCACACUCAUUAA	MIMAT0000341	TGACTAGATCCACACTCATT	No	11	3	5	15	10	13
dme-miR-281-1-5p	5p	dme-mir-281-1	MI0000366	AAGAGA	23	AAAGAGAGCUGUCCGUCGACAGU	MIMAT0000344	AAAGAGAGCTGTCCGTCGACA	No					2
dme-miR-281-3p	3p	dme-mir-281-1	MI0000366	GUCAUG	23	UGUCAUGGAAUUGCUCUCUUUGU	MIMAT0000345	CTGTCATGGAATTGCTCTCTTT	No		2		2
dme-miR-281-2-5p	5p	dme-mir-281-2	MI0000370	AGAGAG	22	AAGAGAGCUAUCCGUCGACAGU	MIMAT0000349	AAGAGAGCTATCCGTCGACAGT	Yes	532	445	326	541	267	394
dme-miR-281-3p	3p	dme-mir-281-2	MI0000370	GUCAUG	23	UGUCAUGGAAUUGCUCUCUUUGU	MIMAT0000345	CTGTCATGGAATTGCTCTCTTT	No		2		2
dme-miR-283-5p	5p	dme-mir-283	MI0000368	AAUAUC	22	AAAUAUCAGCUGGUAAUUCUGG	MIMAT0000347	AAATATCAGCTGGTAATTCTG	No	22	18	12	22	7	17
dme-miR-284-5p	5p	dme-mir-284	MI0000369	CUGGAA	26	CCUGGAAUUAAGUUGACUGUGUAGCC	MIMAT0020811	CCTGGAATTAAGTTGACTGTGTAGCC	Yes	927	1122	278	1240	324	1464
dme-miR-284-3p	3p	dme-mir-284	MI0000369	UCAGCA	21	GUCAGCAACUUGAUUCCAGCA	MIMAT0000348	GTCAGCAACTTGATTCCAGC	No	9	4	3	6	4
dme-miR-285-5p	5p	dme-mir-285	MI0000377	CUGAGA	23	ACUGAGAUCGAUUGGUGCAUAGA	MIMAT0020817	ACTGAGATCGATTGGTGCATAGA	Yes	382	338	136	503	164	357
dme-miR-285-3p	3p	dme-mir-285	MI0000377	AGCACC	22	UAGCACCAUUCGAAAUCAGUGC	MIMAT0000356	TAGCACCATTCGAAATCAGTG	No	15	11	6	13	11	15
dme-miR-286-3p	3p	dme-mir-286	MI0000380	GACUAG	23	UGACUAGACCGAACACUCGUGCU	MIMAT0000359	TGACTAGACCGAACACTCGTGCT	Yes	15	7	7	17	6	13
dme-miR-2a-1-5p	5p	dme-mir-2a-1	MI0000117	UCUCAA	22	CUCUCAAAGUGGUUGUGAAAUG	MIMAT0020780	CTCTCAAAGTGGTTGTGAAATG	Yes	6	3	3	4	3	13
dme-miR-2a-3p	3p	dme-mir-2a-1	MI0000117	AUCACA	23	UAUCACAGCCAGCUUUGAUGAGC	MIMAT0000106	TCACAGCCAGCTTTGATGAG	No	7	6	7	9	10	5
dme-miR-2a-2-5p	5p	dme-mir-2a-2	MI0000118	CUCAUC	21	CCUCAUCAAGUGGUUGUGAUA	MIMAT0020781	CCTCATCAAGTGGTTGTGATA	Yes	196	159	159	258	118	122
dme-miR-2a-3p	3p	dme-mir-2a-2	MI0000118	AUCACA	23	UAUCACAGCCAGCUUUGAUGAGC	MIMAT0000106	TCACAGCCAGCTTTGATGAG	No	7	6	7	9	10	5
dme-miR-2b-1-5p	5p	dme-mir-2b-1	MI0000119	UCUUCA	23	GUCUUCAAAGUGGCAGUGACAUG	MIMAT0020782	GTCTTCAAAGTGGCAGTGACATG	Yes	6	7	4	7	2	4
dme-miR-2b-3p	3p	dme-mir-2b-1	MI0000119	AUCACA	23	UAUCACAGCCAGCUUUGAGGAGC	MIMAT0000107	TATCACAGCCAGCTTTGAGGAG	No	24	32	14	34	19	24
dme-miR-2b-2-5p	5p	dme-mir-2b-2	MI0000120	UCUUCA	23	UUCUUCAAAGUGGUUGUGAAAUG	MIMAT0020783	TTCTTCAAAGTGGTTGTGAAAT	No	104	85	36	120	22	119
dme-miR-2b-3p	3p	dme-mir-2b-2	MI0000120	AUCACA	23	UAUCACAGCCAGCUUUGAGGAGC	MIMAT0000107	TATCACAGCCAGCTTTGAGGAG	No	24	32	14	34	19	24
dme-miR-304-5p	5p	dme-mir-304	MI0000411	AAUCUC	23	UAAUCUCAAUUUGUAAAUGUGAG	MIMAT0000390	TAATCTCAATTTGTAAATGTGA	No		2
dme-miR-305-5p	5p	dme-mir-305	MI0000412	UUGUAC	23	AUUGUACUUCAUCAGGUGCUCUG	MIMAT0000391	ATTGTACTTCATCAGGTGCTC	No	19	32	15	24	26	13
dme-miR-305-3p	3p	dme-mir-305	MI0000412	GGCACA	23	CGGCACAUGUUGAAGUACACUCA	MIMAT0020827	CGGCACATGTTGAAGTACACTC	No	184	140	47	156	72	104
dme-miR-306-5p	5p	dme-mir-306	MI0000414	CAGGUA	22	UCAGGUACUUAGUGACUCUCAA	MIMAT0000393	TCAGGTACTTAGTGACTCTCA	No	58	90	52	81	75	53
dme-miR-306-3p	3p	dme-mir-306	MI0000414	GGGGUC	22	GGGGGUCACUCUGUGCCUGUGC	MIMAT0000394	GGGGGTCACTCTGTGCCTGTGC	Yes	6	11	10	13	8	3
dme-miR-307a-5p	5p	dme-mir-307a	MI0000418	CUCACU	22	ACUCACUCAACCUGGGUGUGAU	MIMAT0020832	ACTCACTCAACCTGGGTGTGAT	Yes	5	9	5	3	7
dme-miR-307a-3p	3p	dme-mir-307a	MI0000418	CACAAC	20	UCACAACCUCCUUGAGUGAG	MIMAT0000398	TCACAACCTCCTTGAGTGAGCGT	No	4	11	4	4		2
dme-miR-308-5p	5p	dme-mir-308	MI0000419	GCAGUA	22	CGCAGUAUAUUUUUGUGUUUUG	MIMAT0020833	CGCAGTATATTTTTGTGTTTTG	Yes	5	3	2	6	3	11
dme-miR-311-3p	3p	dme-mir-311	MI0000423	AUUGCA	22	UAUUGCACAUUCACCGGCCUGA	MIMAT0000403	TATTGCACATTCACCGGCCTG	No			12	3
dme-miR-312-3p	3p	dme-mir-312	MI0000424	AUUGCA	22	UAUUGCACUUGAGACGGCCUGA	MIMAT0000404	TATTGCACTTGAGACGGCCTGA	Yes	5	9	26	12		5
dme-miR-315-5p	5p	dme-mir-315	MI0000427	UUUGAU	22	UUUUGAUUGUUGCUCAGAAAGC	MIMAT0000407	TTTTGATTGTTGCTCAGAAAGCC	No	243	290	131	334	202	277
dme-miR-316-5p	5p	dme-mir-316	MI0000428	GUCUUU	22	UGUCUUUUUCCGCUUACUGGCG	MIMAT0000408	TGTCTTTTTCCGCTTACTGG	No	6			6	2
dme-miR-317-5p	5p	dme-mir-317	MI0000429	GGGAUA	22	UGGGAUACACCCUGUGCUCGCU	MIMAT0020843	TGGGATACACCCTGTGCTCGCT	Yes	8788	7453	5089	10099	4437	6714
dme-miR-317-3p	3p	dme-mir-317	MI0000429	GAACAC	24	UGAACACAGCUGGUGGUAUCCAGU	MIMAT0000409	TGAACACAGCTGGTGGTATCC	No	50	32	25	56	32	23
dme-miR-31a-5p	5p	dme-mir-31a	MI0000420	GGCAAG	23	UGGCAAGAUGUCGGCAUAGCUGA	MIMAT0000400	TGGCAAGATGTCGGCATAGCT	No	173	155	42	161	76	161
dme-miR-33-5p	5p	dme-mir-33	MI0000364	UGCAUU	21	GUGCAUUGUAGUCGCAUUGUC	MIMAT0000342	GTGCATTGTAGTCGCATTGTC	Yes	6671	6415	5745	8223	5385	5375
dme-miR-34-5p	5p	dme-mir-34	MI0000371	GGCAGU	24	UGGCAGUGUGGUUAGCUGGUUGUG	MIMAT0000350	TGGCAGTGTGGTTAGCTGGTT	No	4392	3838	1394	5302	1784	4181
dme-miR-34-3p	3p	dme-mir-34	MI0000371	AGCCAC	23	CAGCCACUAUCUUCACUGCCGCC	MIMAT0020812	CAGCCACTATCTTCACTGCCGCC	Yes	1040	984	462	1215	760	785
dme-miR-375-3p	3p	dme-mir-375	MI0005813	UUGUUC	22	UUUGUUCGUUUGGCUUAAGUUA	MIMAT0005472	TTTGTTCGTTTGGCTTAAGTT	No	45	26	4	23	18	15
dme-miR-4919-3p	3p	dme-mir-4919	MI0017702	AAUCCC	21	UAAUCCCUGAACGACUUGCAG	MIMAT0032117	TAATCCCTGAACGACTTGCAG	Yes			5	6
dme-miR-4949-3p	3p	dme-mir-4949	MI0017735	GUGGUG	22	AGUGGUGUGCGUGUGUGCCUCG	MIMAT0020161	AGTGGTGTGCGTGTGTGCCTCG	Yes				2
dme-miR-4951-5p	5p	dme-mir-4951	MI0017737	CGGGUG	21	UCGGGUGAGGUUUCUGAUGCU	MIMAT0020164	TCGGGTGAGGTTTCTGATGCT	Yes	9	4		3	4	2
dme-miR-5-5p	5p	dme-mir-5	MI0000123	AAGGAA	23	AAAGGAACGAUCGUUGUGAUAUG	MIMAT0000110	AAAGGAACGATCGTTGTGATATG	Yes		3		5	2
dme-miR-7-5p	5p	dme-mir-7	MI0000127	GGAAGA	23	UGGAAGACUAGUGAUUUUGUUGU	MIMAT0000112	TGGAAGACTAGTGATTTTGTTGTT	No	1627	1863	709	2527	687	1686
dme-miR-8-5p	5p	dme-mir-8	MI0000128	AUCUUA	22	CAUCUUACCGGGCAGCAUUAGA	MIMAT0020791	CATCTTACCGGGCAGCATTAGA	Yes	695	540	289	629	328	629
dme-miR-8-3p	3p	dme-mir-8	MI0000128	AAUACU	23	UAAUACUGUCAGGUAAAGAUGUC	MIMAT0000113	TAATACTGTCAGGTAAAGATGTC	Yes	21532	20926	7947	30174	11214	18992
dme-miR-87-5p	5p	dme-mir-87	MI0000382	CGCGCC	22	UCGCGCCUGUAUCUUGCUGAAC	MIMAT0020821	TCGCGCCTGTATCTTGCTGAACC	No	4	3		4
dme-miR-87-3p	3p	dme-mir-87	MI0000382	UGAGCA	21	UUGAGCAAAAUUUCAGGUGUG	MIMAT0000361	TTGAGCAAAATTTCAGGTGTGT	No	6	2	5	10	10	8
dme-miR-927-5p	5p	dme-mir-927	MI0005843	UUAGAA	22	UUUAGAAUUCCUACGCUUUACC	MIMAT0005501	TTTAGAATTCCTACGCTTTACC	Yes	1220	989	323	1301	328	1051
dme-miR-927-3p	3p	dme-mir-927	MI0005843	AAAGCG	22	CAAAGCGUUUGGAUUCUGAAAC	MIMAT0020882	CAAAGCGTTTGGATTCTGAAAC	Yes	226	281	152	232	183	251
dme-miR-929-5p	5p	dme-mir-929	MI0005853	AAUUGA	22	AAAUUGACUCUAGUAGGGAGUC	MIMAT0020892	AAATTGACTCTAGTAGGGAGT	No	7	6	5	5	4	3
dme-miR-929-3p	3p	dme-mir-929	MI0005853	UCCCUA	21	CUCCCUAACGGAGUCAGAUUG	MIMAT0005511	CTCCCTAACGGAGTCAGATTG	Yes	98	122	171	145	150	60
dme-miR-92b-3p	3p	dme-mir-92b	MI0000379	AUUGCA	22	AAUUGCACUAGUCCCGGCCUGC	MIMAT0000358	AATTGCACTAGTCCCGGCCTGC	Yes	39	22	18	26	6	28
dme-miR-932-5p	5p	dme-mir-932	MI0005820	CAAUUC	22	UCAAUUCCGUAGUGCAUUGCAG	MIMAT0005479	TCAATTCCGTAGTGCATTGCAGT	No	15	18	6	15	4	12
dme-miR-932-3p	3p	dme-mir-932	MI0005820	GCAAGC	22	UGCAAGCGCUGCGGAUUUGGCA	MIMAT0020860	TGCAAGCGCTGCGGATTTGGCA	Yes	25	19	3	17	10	15
dme-miR-9383-3p	3p	dme-mir-9383	MI0028932	UCGCCU	22	UUCGCCUUCAAUCUGAACCCCG	MIMAT0035230	TTCGCCTTCAATCTGAACCCCG	Yes		2
dme-miR-954-5p	5p	dme-mir-954	MI0005806	CUGGGU	21	UCUGGGUGUUGCGUUGUGUGU	MIMAT0005465	TCTGGGTGTTGCGTTGTGTGT	Yes	5	10	7	12	9	4
dme-miR-956-3p	3p	dme-mir-956	MI0005810	UUCGAG	23	UUUCGAGACCACUCUAAUCCAUU	MIMAT0005469	TTTCGAGACCACTCTAATCCATT	Yes	4	5	6	11	47	13
dme-miR-957-5p	5p	dme-mir-957	MI0005811	UUAGUU	23	CUUAGUUUUCGACGUGUUUUGGU	MIMAT0020851	CTTAGTTTTCGACGTGTTTTGGT	Yes	2
dme-miR-957-3p	3p	dme-mir-957	MI0005811	GAAACC	22	UGAAACCGUCCAAAACUGAGGC	MIMAT0005470	TGAAACCGTCCAAAACTGAGGC	Yes	1909	1818	507	2553	683	2156
dme-miR-965-5p	5p	dme-mir-965	MI0005821	GGGUAA	23	GGGGUAAAACUGUACGUUAUAUG	MIMAT0020861	GGGGTAAAACTGTACGTTATATG	Yes	5			2
dme-miR-965-3p	3p	dme-mir-965	MI0005821	AAGCGU	22	UAAGCGUAUAGCUUUUCCCCUU	MIMAT0005480	TAAGCGTATAGCTTTTCCCCT	No				3	2	2
dme-miR-969-5p	5p	dme-mir-969	MI0005826	AGUUCC	21	GAGUUCCACUAAGCAAGUUUU	MIMAT0005485	GAGTTCCACTAAGCAAGTTTT	Yes	4		5	9	2	4
dme-miR-969-3p	3p	dme-mir-969	MI0005826	ACUUGA	21	AACUUGACACGUUGAGCUCGU	MIMAT0020866	AACTTGACACGTTGAGCTCGT	Yes		3	4	5	2
dme-miR-970-3p	3p	dme-mir-970	MI0005827	CAUAAG	21	UCAUAAGACACACGCGGCUAU	MIMAT0005486	TCATAAGACACACGCGGCTAT	Yes	326	331	264	370	251	272
dme-miR-971-3p	3p	dme-mir-971	MI0005828	UGGUGU	22	UUGGUGUUACUUCUUACAGUGA	MIMAT0005487	TTGGTGTTACTTCTTGCAGTGA	No	3	2			2
dme-miR-980-5p	5p	dme-mir-980	MI0005837	GUUUUU	24	AGUUUUUCAUUUGGCCUGGCUAGC	MIMAT0020877	AGTTTTTCATTTGGCCTGGCTAGC	Yes						2
dme-miR-980-3p	3p	dme-mir-980	MI0005837	AGCUGC	22	UAGCUGCCUUGUGAAGGGCUUA	MIMAT0005496	TAGCTGCCTTGTGAAGGGCTT	No			3	2
dme-miR-981-5p	5p	dme-mir-981	MI0005838	GGGUUU	22	CGGGUUUCGUUAGCAGCGGGCU	MIMAT0020878	CGGGTTTCGTTAGCAGCGGGCT	Yes	41	35	11	35	16	24
dme-miR-981-3p	3p	dme-mir-981	MI0005838	UCGUUG	22	UUCGUUGUCGACGAAACCUGCA	MIMAT0005497	TTCGTTGTCGACGAAACCTGCA	Yes	1133	1273	740	1474	1041	1133
dme-miR-983-5p	5p	dme-mir-983-1	MI0005840	UAAUAC	22	AUAAUACGUUUCGAACUAAUGA	MIMAT0005499	ATAATACGTTTCGAACTAATG	No			2
dme-miR-983-5p	5p	dme-mir-983-2	MI0005841	UAAUAC	22	AUAAUACGUUUCGAACUAAUGA	MIMAT0005499	ATAATACGTTTCGAACTAATG	No			2
dme-miR-986-5p	5p	dme-mir-986	MI0005845	CUCGAA	22	UCUCGAAUAGCGUUGUGACUGA	MIMAT0005503	TCTCGAATAGTGTTGTGACT	No	1622	1267	834	1602	830	1378
dme-miR-987-5p	5p	dme-mir-987	MI0005846	AAAGUA	24	UAAAGUAAAUAGUCUGGAUUGAUG	MIMAT0005504	TAAAGTAAATAGTCTGGATTGAT	No	297	279	77	368	101	388
dme-miR-988-5p	5p	dme-mir-988	MI0005847	UGUGAU	22	GUGUGAUUUGUAGCAAAGUGAU	MIMAT0020886	GTGTGATTTGTAGCA	No	33	26	18	47	18	35
dme-miR-988-3p	3p	dme-mir-988	MI0005847	CCCUUG	22	CCCCUUGUUGCAAACCUCACGC	MIMAT0005505	CCCCTTGTTGCAAACCTCACG	No	7	8	2	7	2	8
dme-miR-989-3p	3p	dme-mir-989	MI0005848	GUGAUG	21	UGUGAUGUGACGUAGUGGAAC	MIMAT0005506	TGTGATGTGACGTAGTGGAA	No		3
dme-miR-990-5p	5p	dme-mir-990	MI0005850	UUCACC	21	AUUCACCGUUCUGAGUUGGCC	MIMAT0005508	ATTCACCGTTCTGAGTTGGCC	Yes	67	50	28	63	54	68
dme-miR-993-3p	3p	dme-mir-993	MI0005854	AAGCUC	23	GAAGCUCGUCUCUACAGGUAUCU	MIMAT0005512	GAAGCTCGTCTCTACAGGTATCT	Yes	19	29	11	27	16	12
dme-miR-995-5p	5p	dme-mir-995	MI0005856	CCGAAU	22	CCCGAAUUAUGUGGGAGCUGCG	MIMAT0010206	GCCCGAATTATGTGGGAGCTG	No				2
dme-miR-995-3p	3p	dme-mir-995	MI0005856	AGCACC	21	UAGCACCACAUGAUUCGGCUU	MIMAT0005514	TAGCACCACATGATTCGGCTT	Yes	3180	2965	2556	3202	2288	2611
dme-miR-996-5p	5p	dme-mir-996	MI0005857	CGAACA	22	GCGAACAUGGAUCUAGUGCACG	MIMAT0020895	GCGAACATGGATCTAGTGCACG	Yes	88	76	72	114	62	72
dme-miR-996-3p	3p	dme-mir-996	MI0005857	GACUAG	22	UGACUAGAUUUCAUGCUCGUCU	MIMAT0005515	TGACTAGATTTCATGCTCGT	No	16	11	9	15	6	5
dme-miR-998-5p	5p	dme-mir-998	MI0005860	CUGAAU	22	ACUGAAUUCUCGUGGGUCUGCA	MIMAT0020898	ACTGAATTCTCGTGGGTC	No	27	13	7	31	10	11
dme-miR-998-3p	3p	dme-mir-998	MI0005860	AGCACC	21	UAGCACCAUGAGAUUCAGCUC	MIMAT0005518	TAGCACCATGAGATTCAGCTC	Yes	79	78	100	116	72	51
dme-miR-999-5p	5p	dme-mir-999	MI0005861	CAUAGU	22	ACAUAGUCAUACGGUGAAUGUU	MIMAT0020899	ACATAGTCATACGGTGAATGTT	Yes				4
dme-miR-999-3p	3p	dme-mir-999	MI0005861	GUUAAC	22	UGUUAACUGUAAGACUGUGUCU	MIMAT0005519	TGTTAACTGTAAGACTGTGTCT	Yes	56304	65698	75647	74013	58156	57290
dme-miR-9a-5p	5p	dme-mir-9a	MI0000129	CUUUGG	23	UCUUUGGUUAUCUAGCUGUAUGA	MIMAT0000114	TCTTTGGTTATCTAGCTGTAT	No	2177	1982	854	2591	954	1878
dme-miR-9b-5p	5p	dme-mir-9b	MI0000415	CUUUGG	23	UCUUUGGUGAUUUUAGCUGUAUG	MIMAT0000395	TCTTTGGTGATTTTAGCTGTAT	No	151	162	62	172	56	142
dme-miR-9c-5p	5p	dme-mir-9c	MI0000413	CUUUGG	22	UCUUUGGUAUUCUAGCUGUAGA	MIMAT0000392	TCTTTGGTATTCTAGCTGTAG	No	337	346	175	447	190	309
dme-miR-novel-chr2L_2804	3p	dme-mir-novel-chr2L_2804	MYNO41	CUGGCU	20	ACUGGCUCUGGAUCGAGAGG	dme-miR-novel-chr2L_2804	ACTGGCTCTGGATCGAGAGG	Yes	2	5
dme-miR-novel-chr2L_3415	5p	dme-mir-novel-chr2L_3415	MYNO11	ACACCU	22	UACACCUACACACGCACACGCG	dme-miR-novel-chr2L_3415	TACACCTACACACGCACACGCG	Yes	6	2		2	3	2
dme-miR-novel-chr2L_488	5p	dme-mir-novel-chr2L_488	MYNO30	UUGCAG	20	CUUGCAGGGCUGUAGGCUUC	dme-miR-novel-chr2L_488	CTTGCAGGGCTGTAGGCTTC	Yes			4	2		3
dme-miR-novel-chr2R_10147	5p	dme-mir-novel-chr2R_10147	MYNO25	CGCCGU	21	CCGCCGUGACCGUGGCCGCCU	dme-miR-novel-chr2R_10147	CCGCCGTGACCGTGGCCGCCT	Yes	3	5	6	10	2	3
dme-miR-novel-chr2R_10148	3p	dme-mir-novel-chr2R_10148	MYNO4	CGCCGU	21	CCGCCGUGACCGUGGCCGCCU	dme-miR-novel-chr2R_10148	CCGCCGTGACCGTGGCCGCCT	Yes	3	5	6	10	2	3
dme-miR-novel-chr2R_5321	3p	dme-mir-novel-chr2R_5321	MYNO48	UCGCGU	18	AUCGCGUGGUGUUGGCCC	dme-miR-novel-chr2R_5321	CGCGTGTTGTTGGCCC	No			2
dme-miR-novel-chr2R_5478	5p	dme-mir-novel-chr2R_5478	MYNO2	UUCGUG	18	UUUCGUGAUGAAUGACCC	dme-miR-novel-chr2R_5478	TTTCGTGATGAATGACCC	Yes	46	106	155	226	114	66
dme-miR-novel-chr2R_6579	3p	dme-mir-novel-chr2R_6579	MYNO16	GUGUGG	18	UGUGUGGACCGUGCGAGC	dme-miR-novel-chr2R_6579	TGTGTGGACCGTGCGAGC	Yes				2
dme-miR-novel-chr2R_6689	3p	dme-mir-novel-chr2R_6689	MYNO34	GUUGCG	18	CGUUGCGAAGCGGACGCU	dme-miR-novel-chr2R_6689	CGTTGCGAAGCGGACGCT	Yes	2	2	14	8	7	4
dme-miR-novel-chr2R_7065	3p	dme-mir-novel-chr2R_7065	MYNO47	AUGAAG	20	GAUGAAGAUCCUGACCGAGC	dme-miR-novel-chr2R_7065	GATGAAGATCCTGACCGAGC	Yes		2		7	3	2
dme-miR-novel-chr2R_7339	3p	dme-mir-novel-chr2R_7339	MYNO37	CACCAG	18	GCACCAGCUGUGGAGCCU	dme-miR-novel-chr2R_7339	GCACCAGCTGTGGAGCCT	Yes			4	9	7	2
dme-miR-novel-chr2R_9552	3p	dme-mir-novel-chr2R_9552	MYNO26	ACAUCG	21	CACAUCGAUGUUUUUCCACCU	dme-miR-novel-chr2R_9552	CACATCGATGTTTTTCCACCT	Yes				2	2
dme-miR-novel-chr2R_9660	5p	dme-mir-novel-chr2R_9660	MYNO10	GGCCCA	20	UGGCCCAGAUCAUCGGAAAU	dme-miR-novel-chr2R_9660	TGGCCCAGATCATCGGAAAT	Yes			2	4
dme-miR-novel-chr3L_11500	5p	dme-mir-novel-chr3L_11500	MYNO12	CAGCGG	23	ACAGCGGGGUCGUCACCCUUGGC	dme-miR-novel-chr3L_11500	ACAGCGGGGTCGTCATCCTTGGC	No				2
dme-miR-novel-chr3L_13119	5p	dme-mir-novel-chr3L_13119	MYNO8	UGAAGA	18	AUGAAGAAGAUCGAGGAC	dme-miR-novel-chr3L_13119	ATGAAGAAGATCGAGGAC	Yes	2	7	11	26	6	3
dme-miR-novel-chr3L_14313	5p	dme-mir-novel-chr3L_14313	MYNO50	CAGUGG	18	GCAGUGGGAGUGGUUGCC	dme-miR-novel-chr3L_14313	GCAGTGGGAGTGGTTGCC	Yes		2
dme-miR-novel-chr3L_14484	3p	dme-mir-novel-chr3L_14484	MYNO9	UUGUGG	23	AUUGUGGUGCGCCUCAGUGGAAC	dme-miR-novel-chr3L_14484	ATTGTGGTGCGCCTCAGTGGAAC	Yes		8		11	6	6
dme-miR-novel-chr3L_14505	5p	dme-mir-novel-chr3L_14505	MYNO5	AGAUGG	18	AAGAUGGAUGUGGCGAAC	dme-miR-novel-chr3L_14505	AAGATGGATGTGGCGAAC	Yes	7	16	14	8	11	7
dme-miR-novel-chr3R_15509	3p	dme-mir-novel-chr3R_15509	MYNO3	CUGUCA	19	ACUGUCAUCUGAGCUCUGG	dme-miR-novel-chr3R_15509	ACTGTCATCTGAGCTCTGG	Yes	32	36	25	47	19	15
dme-miR-novel-chr3R_15809	3p	dme-mir-novel-chr3R_15809	MYNO55	CAGUCG	17	UCAGUCGGUAGAGCAUU	dme-miR-novel-chr3R_15809	CAGTCGGTAGAGCATG	No	8	6	15	20	11	6
dme-miR-novel-chr3R_16646	5p	dme-mir-novel-chr3R_16646	MYNO52	AGGUUU	22	AAGGUUUUGUCGAACUUCGAUC	dme-miR-novel-chr3R_16646	AAGGTTTTGTCGAACTTCGATC	Yes	7	14	2	11	7	9
dme-miR-novel-chr3R_17005	3p	dme-mir-novel-chr3R_17005	MYNO44	GGGAUG	21	GGGGAUGUAGCUCAGAUGGUA	dme-miR-novel-chr3R_17005	GGGGATGTAGCTCAGATGGTA	Yes	1105	835	1124	1946	836	1048
dme-miR-novel-chr3R_17939	3p	dme-mir-novel-chr3R_17939	MYNO20	UUGUAG	23	GUUGUAGGUUUCGCAUUUCUGAU	dme-miR-novel-chr3R_17939	GTTGTAGGTTTCGCATTTCTGAT	Yes	6	11	2	7		2
dme-miR-novel-chr3R_18150	5p	dme-mir-novel-chr3R_18150	MYNO56	CUGAAG	19	ACUGAAGGACAUGGGCUCC	dme-miR-novel-chr3R_18150	ACTGAAGGACATGGGCTCC	Yes		2	7	5	4
dme-miR-novel-chr3R_18881	5p	dme-mir-novel-chr3R_18881	MYNO32	CAGCGA	25	ACAGCGAGAAGAUCAACGGUAUGGA	dme-miR-novel-chr3R_18881	ACAGCGAGAAGATCAACGGTATGGA	Yes				3
dme-miR-novel-chr3R_20552	3p	dme-mir-novel-chr3R_20552	MYNO35	CUGGAC	17	UCUGGACGUGAAUGUGU	dme-miR-novel-chr3R_20552	TCTGGACGTGAATGTGT	Yes	4	8	10	6	8	4
dme-miR-novel-chrUextra_22950	3p	dme-mir-novel-chrUextra_22950	MYNO57	AUGUAU	23	UAUGUAUGUAAGCGUAUUACCGG	dme-miR-novel-chrUextra_22950	TATGTATGTAAGCGTATTACCGG	Yes	297	394	147	930	168	368
dme-miR-novel-chrUextra_22967	3p	dme-mir-novel-chrUextra_22967	MYNO1	GCGUGU	17	CGCGUGUUGUUGGCCUC	dme-miR-novel-chrUextra_22967	CCGCGTGTTGTTGGCCT	No	2	2	6	6	5	4
dme-miR-novel-chrX_24303	3p	dme-mir-novel-chrX_24303	MYNO7	CGGUGA	18	CCGGUGAUGCGACAGGCC	dme-miR-novel-chrX_24303	CCGGTGATGCGACAGGCC	Yes	26	17	21	17	20	25
dme-miR-novel-chrX_24917	3p	dme-mir-novel-chrX_24917	MYNO17	CGGGUU	20	ACGGGUUGUCAAUGUGGGCC	dme-miR-novel-chrX_24917	ACGGGTTGTCAATGTGGGCC	Yes				3
dme-miR-novel-chrX_25245	3p	dme-mir-novel-chrX_25245	MYNO31	AUUUGC	20	GAUUUGCUUGGAGGCUUCGG	dme-miR-novel-chrX_25245	GATTTGCTTGGAGGCTTCGG	Yes				6	4	2
dme-miR-novel-chrX_26419	5p	dme-mir-novel-chrX_26419	MYNO46	CGAGGU	17	GCGAGGUGAUCCUCGAC	dme-miR-novel-chrX_26419	GCGCGAGGTGATCCT	No				2
dme-miR-novel-chrX_26716	3p	dme-mir-novel-chrX_26716	MYNO6	AAAUGU	20	AAAAUGUUGGGCGGCACGAA	dme-miR-novel-chrX_26716	GTTGGGCGGCACGAA	No	14	11	21	20	14	15

## Sheet: Normalized
miRNA expression for all samples (normalized). Column A: MATURE-ID, the ID of mature miRNA annotated in miRBase 21. Column B: pre-miRNA arm (5p or 3p), the position of the most abundant isomiR on pre-miRNA. Column C: PRE-ID, the pre-miRNA name. Column D: PRE-ACC, the pre-miRNA ACCESSION. Column E: MUTURE-SEED, the seed sequence of the mature miRNA. Column F: MATURE-LENGTH, the length of the matur…
miRNA information										TagCount_Mature_Alone
MATURE-ID	pre-miRNA arm (5p or 3p)	PRE-ID	PRE-ACC	MATURE-SEED	MATURE-LENGTH	MATURE-SEQ	MATURE-ACC	Most_Abundant_Seq	Is_miRBaseMature_Most_Abundant_Seq	control1	PD1	control 2	PD2	control3	PD3
dme-bantam-5p	5p	dme-bantam	MI0000387	CGGUUU	23	CCGGUUUUCGAUUUGGUUUGACU	MIMAT0020823	CCGGTTTTCGATTTGGTTTGACT	Yes	487	595	150	549	253	574
dme-bantam-3p	3p	dme-bantam	MI0000387	GAGAUC	23	UGAGAUCAUUUUGAAAGCUGAUU	MIMAT0000365	TGAGATCATTTTGAAAGCTGAT	No	352	328	130	317	205	307
dme-let-7-5p	5p	dme-let-7	MI0000416	GAGGUA	21	UGAGGUAGUAGGUUGUAUAGU	MIMAT0000396	TGAGGTAGTAGGTTGTATAGT	Yes	4327	5007	4037	4138	4553	3380
dme-miR-1-3p	3p	dme-mir-1	MI0000116	GGAAUG	22	UGGAAUGUAAAGAAGUAUGGAG	MIMAT0000105	TGGAATGTAAAGAAGTATGGAG	Yes	17686	13884	15235	17394	18069	12809
dme-miR-10-5p	5p	dme-mir-10	MI0000130	CCCUGU	22	ACCCUGUAGAUCCGAAUUUGUU	MIMAT0000115	ACCCTGTAGATCCGAATTTGTT	Yes	4328	4144	1239	3618	1857	4042
dme-miR-10-3p	3p	dme-mir-10	MI0000130	AAAUUC	23	CAAAUUCGGUUCUAGAGAGGUUU	MIMAT0012531	CAAATTCGGTTCTAGAGAGGTT	No	30	29	7	21	14	26
dme-miR-100-5p	5p	dme-mir-100	MI0000378	ACCCGU	22	AACCCGUAAAUCCGAACUUGUG	MIMAT0000357	AACCCGTAAATCCGAACTTGT	No	143	154	59	169	89	156
dme-miR-1000-5p	5p	dme-mir-1000	MI0005862	UAUUGU	21	AUAUUGUCCUGUCACAGCAGU	MIMAT0005520	ATATTGTCCTGTCACAGCAG	No	233	273	288	297	335	194
dme-miR-1000-3p	3p	dme-mir-1000	MI0005862	UGCUGG	22	CUGCUGGGUCGGGGCAUUAACA	MIMAT0020900	CTGCTGGGTCGGGGCATTAACA	Yes	10	8	9	8	9	13
dme-miR-1001-5p	5p	dme-mir-1001	MI0005863	GGGUAA	21	UGGGUAAACUCCCAAGGAUCA	MIMAT0005521	TGGGTAAACTCCCAAGGATCAGG	No	1				3
dme-miR-1003-3p	3p	dme-mir-1003	MI0005864	CUCACA	22	UCUCACAUUUACAUAUUCACAG	MIMAT0005016	TCTCACATTTACATATTCACA	No	3	2	2	4	3	3
dme-miR-1004-5p	5p	dme-mir-1004	MI0005865	UUGGGG	23	GUUGGGGGACAUUGAUCUCGGAG	MIMAT0032027	GTTGGGGGACATTGATCTCGGAGA	No	1	2	2	4		3
dme-miR-1004-3p	3p	dme-mir-1004	MI0005865	CUCACA	22	UCUCACAUCACUUCCCUCACAG	MIMAT0005017	TCTCACATCACTTCCCTCACAG	Yes	45	49	23	36	15	50
dme-miR-1006-3p	3p	dme-mir-1006	MI0005867	AAAUUC	23	UAAAUUCGAUUUCUUAUUCAUAG	MIMAT0005019	TAAATTCGATTTCTTATTCATAG	Yes	8	11	2	6	5	12
dme-miR-1008-5p	5p	dme-mir-1008	MI0005869	UAAAUA	21	GUAAAUAUCUAAAGUUGAACU	MIMAT0032028	GTAAATATCTAAAGTTGAACT	Yes	3	6	2	4		3
dme-miR-1010-5p	5p	dme-mir-1010	MI0005871	AAGUGG	20	UAAGUGGUGUAGAUGAAACA	MIMAT0020905	GTAAGTGGTGTAGATGAAACA	No			2	2	2
dme-miR-1010-3p	3p	dme-mir-1010	MI0005871	UUCACC	24	UUUCACCUAUCGUUCCAUUUGCAG	MIMAT0005023	TTTCACCTATCGTTCCATTTGC	No	27	12	3	22	14	28
dme-miR-1012-5p	5p	dme-mir-1012	MI0005873	GGGUAG	21	UGGGUAGAACUUUGAUUAAUA	MIMAT0020906	GTGGGTAGAACTTTGATTAAT	No	2	4	2	2	3	3
dme-miR-1012-3p	3p	dme-mir-1012	MI0005873	UAGUCA	23	UUAGUCAAAGAUUUUCCCCAUAG	MIMAT0005025	TTAGTCAAAGATTTTCCCCATAG	Yes	17	13	7	15	6	9
dme-miR-1016-3p	3p	dme-mir-1016	MI0005877	UCACCU	21	UUCACCUCUCUCCAUACUUAG	MIMAT0005029	AGTTCACCTCTCTCCAT	No	1
dme-miR-1017-3p	3p	dme-mir-1017	MI0005878	AAAGCU	23	GAAAGCUCUACCCAAACUCAUCC	MIMAT0005030	GAAAGCTCTACCCAAACTCATCC	Yes	12	6	3	11	4	9
dme-miR-11-5p	5p	dme-mir-11	MI0000131	AAGAAC	22	CAAGAACUUUCUCUGUGACCCG	MIMAT0020793	CAAGAACTTTCTCTGTGACCCG	Yes	132	118	43	91	62	115
dme-miR-11-3p	3p	dme-mir-11	MI0000131	AUCACA	21	CAUCACAGUCUGAGUUCUUGC	MIMAT0000116	CATCACAGTCTGAGTTCTTGCT	No	1032	970	889	1004	1007	1032
dme-miR-12-5p	5p	dme-mir-12	MI0000132	GAGUAU	23	UGAGUAUUACAUCAGGUACUGGU	MIMAT0000117	TGAGTATTACATCAGGTACTGGT	Yes	182	206	81	198	149	201
dme-miR-124-5p	5p	dme-mir-124	MI0000373	GUAUCC	23	GGUAUCCACUGUAGGCCUAUAUG	MIMAT0020813	GGTATCCACTGTAGGCCTATATG	Yes	14	6	3	6	7	9
dme-miR-124-3p	3p	dme-mir-124	MI0000373	AAGGCA	23	UAAGGCACGCGGUGAAUGCCAAG	MIMAT0000351	TAAGGCACGCGGTGAATGCC	No		2				2
dme-miR-125-5p	5p	dme-mir-125	MI0000417	CCCUGA	22	UCCCUGAGACCCUAACUUGUGA	MIMAT0000397	TCCCTGAGACCCTAACTTGTG	No	52	37	18	51	27	64
dme-miR-125-3p	3p	dme-mir-125	MI0000417	CAAGUU	21	ACAAGUUUUGAUCUCCGGUAU	MIMAT0020831	ACAAGTTTTGATCTCCGGTAT	Yes	63	71	51	83	80	65
dme-miR-133-5p	5p	dme-mir-133	MI0000362	GCUGGU	23	AGCUGGUUGACAUCGGGUCAGAU	MIMAT0020806	AGCTGGTTGACATCGGGTCAGAT	Yes	12	16	7	12	17	9
dme-miR-133-3p	3p	dme-mir-133	MI0000362	UGGUCC	22	UUGGUCCCCUUCAACCAGCUGU	MIMAT0000340	TTGGTCCCCTTCAACCAGCTG	No	5549	7117	4259	5446	4772	6415
dme-miR-137-5p	5p	dme-mir-137	MI0005849	CGUGUA	23	ACGUGUAUGCUCGUAGCUAUAAC	MIMAT0020888	ACGTGTATGCTCGTAGCTATAAC	Yes	1	2
dme-miR-137-3p	3p	dme-mir-137	MI0005849	AUUGCU	22	UAUUGCUUGAGAAUACACGUAG	MIMAT0005507	TATTGCTTGAGAATACACGTAG	Yes	150	181	99	149	147	175
dme-miR-13a-5p	5p	dme-mir-13a	MI0000133	UCCUCA	22	CUCCUCAAAGGGUUGUGAAAUG	MIMAT0020795	CTCCTCAAAGGGTTGTGAAATG	Yes		2		4		6
dme-miR-13a-3p	3p	dme-mir-13a	MI0000133	AUCACA	22	UAUCACAGCCAUUUUGAUGAGU	MIMAT0000118	TATCACAGCCATTTTGATGAGTT	No	6	6	2	5	5	8
dme-miR-13b-1-5p	5p	dme-mir-13b-1	MI0000134	CGUUAA	25	UCGUUAAAAUGUUUGUGAACUUAUG	MIMAT0020796	TCGTTAAAATGTTTGTGAACT	No		2				2
dme-miR-13b-3p	3p	dme-mir-13b-1	MI0000134	AUCACA	22	UAUCACAGCCAUUUUGACGAGU	MIMAT0000119	TATCACAGCCATTTTGACGAGT	Yes	48	78	34	62	50	72
dme-miR-13b-3p	3p	dme-mir-13b-2	MI0000135	AUCACA	22	UAUCACAGCCAUUUUGACGAGU	MIMAT0000119	TATCACAGCCATTTTGACGAGT	Yes	48	78	34	62	50	72
dme-miR-14-5p	5p	dme-mir-14	MI0000136	GGAGCG	22	GGGAGCGAGACGGGGACUCACU	MIMAT0020798	GGGAGCGAGACGGGGACTCACT	Yes	460	444	200	306	202	354
dme-miR-14-3p	3p	dme-mir-14	MI0000136	CAGUCU	22	UCAGUCUUUUUCUCUCUCCUAU	MIMAT0000120	TCAGTCTTTTTCTCTCTCCT	No	2888	2416	1456	2533	1810	2620
dme-miR-184-5p	5p	dme-mir-184	MI0000354	CUUAUC	21	CCUUAUCAUUCUCUCGCCCCG	MIMAT0000330	CCTTATCATTCTCTCGCCCCGT	No	3				2
dme-miR-184-3p	3p	dme-mir-184	MI0000354	GGACGG	22	UGGACGGAGAACUGAUAAGGGC	MIMAT0000331	TGGACGGAGAACTGATAAGG	No	83428	83648	49185	81190	62579	92826
dme-miR-190-5p	5p	dme-mir-190	MI0005808	GAUAUG	24	AGAUAUGUUUGAUAUUCUUGGUUG	MIMAT0005467	AGATATGTTTGATATTCTTGGTTG	Yes	784	1873	610	358	851	952
dme-miR-190-3p	3p	dme-mir-190	MI0005808	CCAGGA	22	CCCAGGAAUCAAACAUAUUAUU	MIMAT0020848	CCCAGGAATCAAACATATTATT	Yes	3	7	2	4	2	3
dme-miR-193-5p	5p	dme-mir-193	MI0005809	UGGGAU	22	UUGGGAUUUUUUAGAUCAGCAG	MIMAT0020849	GGTTGGGATTTTTTAGATCAGC	No	8	8	5	13	9	4
dme-miR-193-3p	3p	dme-mir-193	MI0005809	ACUGGC	22	UACUGGCCUACUAAGUCCCAAC	MIMAT0005468	TACTGGCCTACTAAGTCCCAAC	Yes	6	12	6	10	5	3
dme-miR-210-5p	5p	dme-mir-210	MI0000376	GCUGCU	23	AGCUGCUGGCCACUGCACAAGAU	MIMAT0020816	AGCTGCTGGCCACTGCACAAGA	No	2	2	2	2		3
dme-miR-210-3p	3p	dme-mir-210	MI0000376	UUGUGC	23	CUUGUGCGUGUGACAGCGGCUAU	MIMAT0000355	CTTGTGCGTGTGACAGCGGCT	No	617	680	594	616	648	693
dme-miR-219-5p	5p	dme-mir-219	MI0000358	GAUUGU	21	UGAUUGUCCAAACGCAAUUCU	MIMAT0000335	TGATTGTCCAAACGCAATTCT	Yes	12	16	18	20	22	16
dme-miR-2500-3p	3p	dme-mir-2500	MI0011589	GAUUUU	22	GGAUUUUGUGUGUGGACCUCAG	MIMAT0012215	GGATTTTGTGTGTGGACCTCAG	Yes	2	2
dme-miR-252-5p	5p	dme-mir-252	MI0005858	UAAGUA	22	CUAAGUACUAGUGCCGCAGGAG	MIMAT0005516	CTAAGTACTAGTGCCGCAGGAG	Yes	481	534	301	496	496	590
dme-miR-252-3p	3p	dme-mir-252	MI0005858	CCUGCU	22	UCCUGCUGCCCAAGUGCUUAUU	MIMAT0020896	TCCTGCTGCCCAAGTGCTTATT	Yes	8	5	5	4	5	5
dme-miR-263a-5p	5p	dme-mir-263a	MI0000343	AUGGCA	24	AAUGGCACUGGAAGAAUUCACGGG	MIMAT0000319	AATGGCACTGGAAGAATTCAC	No	4753	4477	788	3193	1961	5092
dme-miR-263b-5p	5p	dme-mir-263b	MI0000383	UUGGCA	21	CUUGGCACUGGGAGAAUUCAC	MIMAT0000362	CTTGGCACTGGGAGAATTCAC	Yes	337	383	174	298	231	413
dme-miR-274-5p	5p	dme-mir-274	MI0000355	UUGUGA	23	UUUGUGACCGACACUAACGGGUA	MIMAT0000332	TTTGTGACCGACACTAACGGGT	No	2212	2552	1223	2899	1634	2543
dme-miR-275-5p	5p	dme-mir-275	MI0000356	GCGCUA	23	CGCGCUAAUCAGUGACCGGGGCU	MIMAT0020801	CGCGCTAATCAGTGACCGGGGCT	Yes	51	57	27	36	27	38
dme-miR-275-3p	3p	dme-mir-275	MI0000356	CAGGUA	23	UCAGGUACCUGAAGUAGCGCGCG	MIMAT0000333	TCAGGTACCTGAAGTAGCGCGC	No	33	49	24	28	46	40
dme-miR-276a-3p	3p	dme-mir-276a	MI0000359	AGGAAC	22	UAGGAACUUCAUACCGUGCUCU	MIMAT0000337	TAGGAACTTCATACCGTGCTCT	Yes	20822	20957	18458	23827	33928	18214
dme-miR-276b-3p	3p	dme-mir-276b	MI0000375	AGGAAC	22	UAGGAACUUAAUACCGUGCUCU	MIMAT0000354	TAGGAACTTAATACCGTGCTCT	Yes	2894	3278	2879	3425	5608	2739
dme-miR-277-5p	5p	dme-mir-277	MI0000360	GUGUCA	21	CGUGUCAGGAGUGCAUUUGCA	MIMAT0020804	CGTGTCAGGAGTGCATTTGCA	Yes	25	34	5	19	25	28
dme-miR-277-3p	3p	dme-mir-277	MI0000360	AAAUGC	23	UAAAUGCACUAUCUGGUACGACA	MIMAT0000338	TAAATGCACTATCTGGTACGAC	No	605	560	172	555	367	593
dme-miR-278-5p	5p	dme-mir-278	MI0000361	CGGAUG	23	CCGGAUGAUGGUUCACAACGACC	MIMAT0020805	CCGGATGATGGTTCACAACGACC	Yes	52	59	24	36	26	57
dme-miR-278-3p	3p	dme-mir-278	MI0000361	CGGUGG	22	UCGGUGGGACUUUCGUCCGUUU	MIMAT0000339	TCGGTGGGACTTTCGTCCGTTT	Yes	347	441	728	568	867	251
dme-miR-279-3p	3p	dme-mir-279	MI0000363	GACUAG	22	UGACUAGAUCCACACUCAUUAA	MIMAT0000341	TGACTAGATCCACACTCATT	No	8	2	4	9	10	11
dme-miR-281-1-5p	5p	dme-mir-281-1	MI0000366	AAGAGA	23	AAAGAGAGCUGUCCGUCGACAGU	MIMAT0000344	AAAGAGAGCTGTCCGTCGACA	No					2
dme-miR-281-3p	3p	dme-mir-281-1	MI0000366	GUCAUG	23	UGUCAUGGAAUUGCUCUCUUUGU	MIMAT0000345	CTGTCATGGAATTGCTCTCTTT	No		2		1
dme-miR-281-2-5p	5p	dme-mir-281-2	MI0000370	AGAGAG	22	AAGAGAGCUAUCCGUCGACAGU	MIMAT0000349	AAGAGAGCTATCCGTCGACAGT	Yes	363	349	256	327	261	339
dme-miR-281-3p	3p	dme-mir-281-2	MI0000370	GUCAUG	23	UGUCAUGGAAUUGCUCUCUUUGU	MIMAT0000345	CTGTCATGGAATTGCTCTCTTT	No		2		1
dme-miR-283-5p	5p	dme-mir-283	MI0000368	AAUAUC	22	AAAUAUCAGCUGGUAAUUCUGG	MIMAT0000347	AAATATCAGCTGGTAATTCTG	No	15	14	9	13	7	15
dme-miR-284-5p	5p	dme-mir-284	MI0000369	CUGGAA	26	CCUGGAAUUAAGUUGACUGUGUAGCC	MIMAT0020811	CCTGGAATTAAGTTGACTGTGTAGCC	Yes	633	879	218	750	317	1261
dme-miR-284-3p	3p	dme-mir-284	MI0000369	UCAGCA	21	GUCAGCAACUUGAUUCCAGCA	MIMAT0000348	GTCAGCAACTTGATTCCAGC	No	6	3	2	4	4
dme-miR-285-5p	5p	dme-mir-285	MI0000377	CUGAGA	23	ACUGAGAUCGAUUGGUGCAUAGA	MIMAT0020817	ACTGAGATCGATTGGTGCATAGA	Yes	261	265	107	304	161	307
dme-miR-285-3p	3p	dme-mir-285	MI0000377	AGCACC	22	UAGCACCAUUCGAAAUCAGUGC	MIMAT0000356	TAGCACCATTCGAAATCAGTG	No	10	9	5	8	11	13
dme-miR-286-3p	3p	dme-mir-286	MI0000380	GACUAG	23	UGACUAGACCGAACACUCGUGCU	MIMAT0000359	TGACTAGACCGAACACTCGTGCT	Yes	10	5	5	10	6	11
dme-miR-2a-1-5p	5p	dme-mir-2a-1	MI0000117	UCUCAA	22	CUCUCAAAGUGGUUGUGAAAUG	MIMAT0020780	CTCTCAAAGTGGTTGTGAAATG	Yes	4	2	2	2	3	11
dme-miR-2a-3p	3p	dme-mir-2a-1	MI0000117	AUCACA	23	UAUCACAGCCAGCUUUGAUGAGC	MIMAT0000106	TCACAGCCAGCTTTGATGAG	No	5	5	5	5	10	4
dme-miR-2a-2-5p	5p	dme-mir-2a-2	MI0000118	CUCAUC	21	CCUCAUCAAGUGGUUGUGAUA	MIMAT0020781	CCTCATCAAGTGGTTGTGATA	Yes	134	125	125	156	116	105
dme-miR-2a-3p	3p	dme-mir-2a-2	MI0000118	AUCACA	23	UAUCACAGCCAGCUUUGAUGAGC	MIMAT0000106	TCACAGCCAGCTTTGATGAG	No	5	5	5	5	10	4
dme-miR-2b-1-5p	5p	dme-mir-2b-1	MI0000119	UCUUCA	23	GUCUUCAAAGUGGCAGUGACAUG	MIMAT0020782	GTCTTCAAAGTGGCAGTGACATG	Yes	4	5	3	4	2	3
dme-miR-2b-3p	3p	dme-mir-2b-1	MI0000119	AUCACA	23	UAUCACAGCCAGCUUUGAGGAGC	MIMAT0000107	TATCACAGCCAGCTTTGAGGAG	No	16	25	11	21	19	21
dme-miR-2b-2-5p	5p	dme-mir-2b-2	MI0000120	UCUUCA	23	UUCUUCAAAGUGGUUGUGAAAUG	MIMAT0020783	TTCTTCAAAGTGGTTGTGAAAT	No	71	67	28	73	22	102
dme-miR-2b-3p	3p	dme-mir-2b-2	MI0000120	AUCACA	23	UAUCACAGCCAGCUUUGAGGAGC	MIMAT0000107	TATCACAGCCAGCTTTGAGGAG	No	16	25	11	21	19	21
dme-miR-304-5p	5p	dme-mir-304	MI0000411	AAUCUC	23	UAAUCUCAAUUUGUAAAUGUGAG	MIMAT0000390	TAATCTCAATTTGTAAATGTGA	No		2
dme-miR-305-5p	5p	dme-mir-305	MI0000412	UUGUAC	23	AUUGUACUUCAUCAGGUGCUCUG	MIMAT0000391	ATTGTACTTCATCAGGTGCTC	No	13	25	12	15	25	11
dme-miR-305-3p	3p	dme-mir-305	MI0000412	GGCACA	23	CGGCACAUGUUGAAGUACACUCA	MIMAT0020827	CGGCACATGTTGAAGTACACTC	No	126	110	37	94	71	90
dme-miR-306-5p	5p	dme-mir-306	MI0000414	CAGGUA	22	UCAGGUACUUAGUGACUCUCAA	MIMAT0000393	TCAGGTACTTAGTGACTCTCA	No	40	71	41	49	73	46
dme-miR-306-3p	3p	dme-mir-306	MI0000414	GGGGUC	22	GGGGGUCACUCUGUGCCUGUGC	MIMAT0000394	GGGGGTCACTCTGTGCCTGTGC	Yes	4	9	8	8	8	3
dme-miR-307a-5p	5p	dme-mir-307a	MI0000418	CUCACU	22	ACUCACUCAACCUGGGUGUGAU	MIMAT0020832	ACTCACTCAACCTGGGTGTGAT	Yes	3	7	4	2	7
dme-miR-307a-3p	3p	dme-mir-307a	MI0000418	CACAAC	20	UCACAACCUCCUUGAGUGAG	MIMAT0000398	TCACAACCTCCTTGAGTGAGCGT	No	3	9	3	2		2
dme-miR-308-5p	5p	dme-mir-308	MI0000419	GCAGUA	22	CGCAGUAUAUUUUUGUGUUUUG	MIMAT0020833	CGCAGTATATTTTTGTGTTTTG	Yes	3	2	2	4	3	9
dme-miR-311-3p	3p	dme-mir-311	MI0000423	AUUGCA	22	UAUUGCACAUUCACCGGCCUGA	MIMAT0000403	TATTGCACATTCACCGGCCTG	No			9	2
dme-miR-312-3p	3p	dme-mir-312	MI0000424	AUUGCA	22	UAUUGCACUUGAGACGGCCUGA	MIMAT0000404	TATTGCACTTGAGACGGCCTGA	Yes	3	7	20	7		4
dme-miR-315-5p	5p	dme-mir-315	MI0000427	UUUGAU	22	UUUUGAUUGUUGCUCAGAAAGC	MIMAT0000407	TTTTGATTGTTGCTCAGAAAGCC	No	166	227	103	202	198	239
dme-miR-316-5p	5p	dme-mir-316	MI0000428	GUCUUU	22	UGUCUUUUUCCGCUUACUGGCG	MIMAT0000408	TGTCTTTTTCCGCTTACTGG	No	4			4	2
dme-miR-317-5p	5p	dme-mir-317	MI0000429	GGGAUA	22	UGGGAUACACCCUGUGCUCGCU	MIMAT0020843	TGGGATACACCCTGTGCTCGCT	Yes	5999	5842	3998	6105	4345	5782
dme-miR-317-3p	3p	dme-mir-317	MI0000429	GAACAC	24	UGAACACAGCUGGUGGUAUCCAGU	MIMAT0000409	TGAACACAGCTGGTGGTATCC	No	34	25	20	34	31	20
dme-miR-31a-5p	5p	dme-mir-31a	MI0000420	GGCAAG	23	UGGCAAGAUGUCGGCAUAGCUGA	MIMAT0000400	TGGCAAGATGTCGGCATAGCT	No	118	121	33	97	74	139
dme-miR-33-5p	5p	dme-mir-33	MI0000364	UGCAUU	21	GUGCAUUGUAGUCGCAUUGUC	MIMAT0000342	GTGCATTGTAGTCGCATTGTC	Yes	4554	5028	4514	4971	5273	4629
dme-miR-34-5p	5p	dme-mir-34	MI0000371	GGCAGU	24	UGGCAGUGUGGUUAGCUGGUUGUG	MIMAT0000350	TGGCAGTGTGGTTAGCTGGTT	No	2998	3008	1095	3205	1747	3601
dme-miR-34-3p	3p	dme-mir-34	MI0000371	AGCCAC	23	CAGCCACUAUCUUCACUGCCGCC	MIMAT0020812	CAGCCACTATCTTCACTGCCGCC	Yes	710	771	363	735	744	676
dme-miR-375-3p	3p	dme-mir-375	MI0005813	UUGUUC	22	UUUGUUCGUUUGGCUUAAGUUA	MIMAT0005472	TTTGTTCGTTTGGCTTAAGTT	No	31	20	3	14	18	13
dme-miR-4919-3p	3p	dme-mir-4919	MI0017702	AAUCCC	21	UAAUCCCUGAACGACUUGCAG	MIMAT0032117	TAATCCCTGAACGACTTGCAG	Yes			4	4
dme-miR-4949-3p	3p	dme-mir-4949	MI0017735	GUGGUG	22	AGUGGUGUGCGUGUGUGCCUCG	MIMAT0020161	AGTGGTGTGCGTGTGTGCCTCG	Yes				1
dme-miR-4951-5p	5p	dme-mir-4951	MI0017737	CGGGUG	21	UCGGGUGAGGUUUCUGAUGCU	MIMAT0020164	TCGGGTGAGGTTTCTGATGCT	Yes	6	3		2	4	2
dme-miR-5-5p	5p	dme-mir-5	MI0000123	AAGGAA	23	AAAGGAACGAUCGUUGUGAUAUG	MIMAT0000110	AAAGGAACGATCGTTGTGATATG	Yes		2		3	2
dme-miR-7-5p	5p	dme-mir-7	MI0000127	GGAAGA	23	UGGAAGACUAGUGAUUUUGUUGU	MIMAT0000112	TGGAAGACTAGTGATTTTGTTGTT	No	1111	1460	557	1528	673	1452
dme-miR-8-5p	5p	dme-mir-8	MI0000128	AUCUUA	22	CAUCUUACCGGGCAGCAUUAGA	MIMAT0020791	CATCTTACCGGGCAGCATTAGA	Yes	474	423	227	380	321	542
dme-miR-8-3p	3p	dme-mir-8	MI0000128	AAUACU	23	UAAUACUGUCAGGUAAAGAUGUC	MIMAT0000113	TAATACTGTCAGGTAAAGATGTC	Yes	14699	16403	6244	18242	10981	16357
dme-miR-87-5p	5p	dme-mir-87	MI0000382	CGCGCC	22	UCGCGCCUGUAUCUUGCUGAAC	MIMAT0020821	TCGCGCCTGTATCTTGCTGAACC	No	3	2		2
dme-miR-87-3p	3p	dme-mir-87	MI0000382	UGAGCA	21	UUGAGCAAAAUUUCAGGUGUG	MIMAT0000361	TTGAGCAAAATTTCAGGTGTGT	No	4	2	4	6	10	7
dme-miR-927-5p	5p	dme-mir-927	MI0005843	UUAGAA	22	UUUAGAAUUCCUACGCUUUACC	MIMAT0005501	TTTAGAATTCCTACGCTTTACC	Yes	833	775	254	787	321	905
dme-miR-927-3p	3p	dme-mir-927	MI0005843	AAAGCG	22	CAAAGCGUUUGGAUUCUGAAAC	MIMAT0020882	CAAAGCGTTTGGATTCTGAAAC	Yes	154	220	119	140	179	216
dme-miR-929-5p	5p	dme-mir-929	MI0005853	AAUUGA	22	AAAUUGACUCUAGUAGGGAGUC	MIMAT0020892	AAATTGACTCTAGTAGGGAGT	No	5	5	4	3	4	3
dme-miR-929-3p	3p	dme-mir-929	MI0005853	UCCCUA	21	CUCCCUAACGGAGUCAGAUUG	MIMAT0005511	CTCCCTAACGGAGTCAGATTG	Yes	67	96	134	88	147	52
dme-miR-92b-3p	3p	dme-mir-92b	MI0000379	AUUGCA	22	AAUUGCACUAGUCCCGGCCUGC	MIMAT0000358	AATTGCACTAGTCCCGGCCTGC	Yes	27	17	14	16	6	24
dme-miR-932-5p	5p	dme-mir-932	MI0005820	CAAUUC	22	UCAAUUCCGUAGUGCAUUGCAG	MIMAT0005479	TCAATTCCGTAGTGCATTGCAGT	No	10	14	5	9	4	10
dme-miR-932-3p	3p	dme-mir-932	MI0005820	GCAAGC	22	UGCAAGCGCUGCGGAUUUGGCA	MIMAT0020860	TGCAAGCGCTGCGGATTTGGCA	Yes	17	15	2	10	10	13
dme-miR-9383-3p	3p	dme-mir-9383	MI0028932	UCGCCU	22	UUCGCCUUCAAUCUGAACCCCG	MIMAT0035230	TTCGCCTTCAATCTGAACCCCG	Yes		2
dme-miR-954-5p	5p	dme-mir-954	MI0005806	CUGGGU	21	UCUGGGUGUUGCGUUGUGUGU	MIMAT0005465	TCTGGGTGTTGCGTTGTGTGT	Yes	3	8	5	7	9	3
dme-miR-956-3p	3p	dme-mir-956	MI0005810	UUCGAG	23	UUUCGAGACCACUCUAAUCCAUU	MIMAT0005469	TTTCGAGACCACTCTAATCCATT	Yes	3	4	5	7	46	11
dme-miR-957-5p	5p	dme-mir-957	MI0005811	UUAGUU	23	CUUAGUUUUCGACGUGUUUUGGU	MIMAT0020851	CTTAGTTTTCGACGTGTTTTGGT	Yes	1
dme-miR-957-3p	3p	dme-mir-957	MI0005811	GAAACC	22	UGAAACCGUCCAAAACUGAGGC	MIMAT0005470	TGAAACCGTCCAAAACTGAGGC	Yes	1303	1425	398	1543	669	1857
dme-miR-965-5p	5p	dme-mir-965	MI0005821	GGGUAA	23	GGGGUAAAACUGUACGUUAUAUG	MIMAT0020861	GGGGTAAAACTGTACGTTATATG	Yes	3			1
dme-miR-965-3p	3p	dme-mir-965	MI0005821	AAGCGU	22	UAAGCGUAUAGCUUUUCCCCUU	MIMAT0005480	TAAGCGTATAGCTTTTCCCCT	No				2	2	2
dme-miR-969-5p	5p	dme-mir-969	MI0005826	AGUUCC	21	GAGUUCCACUAAGCAAGUUUU	MIMAT0005485	GAGTTCCACTAAGCAAGTTTT	Yes	3		4	5	2	3
dme-miR-969-3p	3p	dme-mir-969	MI0005826	ACUUGA	21	AACUUGACACGUUGAGCUCGU	MIMAT0020866	AACTTGACACGTTGAGCTCGT	Yes		2	3	3	2
dme-miR-970-3p	3p	dme-mir-970	MI0005827	CAUAAG	21	UCAUAAGACACACGCGGCUAU	MIMAT0005486	TCATAAGACACACGCGGCTAT	Yes	223	259	207	224	246	234
dme-miR-971-3p	3p	dme-mir-971	MI0005828	UGGUGU	22	UUGGUGUUACUUCUUACAGUGA	MIMAT0005487	TTGGTGTTACTTCTTGCAGTGA	No	2	2			2
dme-miR-980-5p	5p	dme-mir-980	MI0005837	GUUUUU	24	AGUUUUUCAUUUGGCCUGGCUAGC	MIMAT0020877	AGTTTTTCATTTGGCCTGGCTAGC	Yes						2
dme-miR-980-3p	3p	dme-mir-980	MI0005837	AGCUGC	22	UAGCUGCCUUGUGAAGGGCUUA	MIMAT0005496	TAGCTGCCTTGTGAAGGGCTT	No			2	1
dme-miR-981-5p	5p	dme-mir-981	MI0005838	GGGUUU	22	CGGGUUUCGUUAGCAGCGGGCU	MIMAT0020878	CGGGTTTCGTTAGCAGCGGGCT	Yes	28	27	9	21	16	21
dme-miR-981-3p	3p	dme-mir-981	MI0005838	UCGUUG	22	UUCGUUGUCGACGAAACCUGCA	MIMAT0005497	TTCGTTGTCGACGAAACCTGCA	Yes	773	998	581	891	1019	976
dme-miR-983-5p	5p	dme-mir-983-1	MI0005840	UAAUAC	22	AUAAUACGUUUCGAACUAAUGA	MIMAT0005499	ATAATACGTTTCGAACTAATG	No			2
dme-miR-983-5p	5p	dme-mir-983-2	MI0005841	UAAUAC	22	AUAAUACGUUUCGAACUAAUGA	MIMAT0005499	ATAATACGTTTCGAACTAATG	No			2
dme-miR-986-5p	5p	dme-mir-986	MI0005845	CUCGAA	22	UCUCGAAUAGCGUUGUGACUGA	MIMAT0005503	TCTCGAATAGTGTTGTGACT	No	1107	993	655	968	813	1187
dme-miR-987-5p	5p	dme-mir-987	MI0005846	AAAGUA	24	UAAAGUAAAUAGUCUGGAUUGAUG	MIMAT0005504	TAAAGTAAATAGTCTGGATTGAT	No	203	219	60	222	99	334
dme-miR-988-5p	5p	dme-mir-988	MI0005847	UGUGAU	22	GUGUGAUUUGUAGCAAAGUGAU	MIMAT0020886	GTGTGATTTGTAGCA	No	23	20	14	28	18	30
dme-miR-988-3p	3p	dme-mir-988	MI0005847	CCCUUG	22	CCCCUUGUUGCAAACCUCACGC	MIMAT0005505	CCCCTTGTTGCAAACCTCACG	No	5	6	2	4	2	7
dme-miR-989-3p	3p	dme-mir-989	MI0005848	GUGAUG	21	UGUGAUGUGACGUAGUGGAAC	MIMAT0005506	TGTGATGTGACGTAGTGGAA	No		2
dme-miR-990-5p	5p	dme-mir-990	MI0005850	UUCACC	21	AUUCACCGUUCUGAGUUGGCC	MIMAT0005508	ATTCACCGTTCTGAGTTGGCC	Yes	46	39	22	38	53	59
dme-miR-993-3p	3p	dme-mir-993	MI0005854	AAGCUC	23	GAAGCUCGUCUCUACAGGUAUCU	MIMAT0005512	GAAGCTCGTCTCTACAGGTATCT	Yes	13	23	9	16	16	10
dme-miR-995-5p	5p	dme-mir-995	MI0005856	CCGAAU	22	CCCGAAUUAUGUGGGAGCUGCG	MIMAT0010206	GCCCGAATTATGTGGGAGCTG	No				1
dme-miR-995-3p	3p	dme-mir-995	MI0005856	AGCACC	21	UAGCACCACAUGAUUCGGCUU	MIMAT0005514	TAGCACCACATGATTCGGCTT	Yes	2171	2324	2008	1936	2241	2249
dme-miR-996-5p	5p	dme-mir-996	MI0005857	CGAACA	22	GCGAACAUGGAUCUAGUGCACG	MIMAT0020895	GCGAACATGGATCTAGTGCACG	Yes	60	60	57	69	61	62
dme-miR-996-3p	3p	dme-mir-996	MI0005857	GACUAG	22	UGACUAGAUUUCAUGCUCGUCU	MIMAT0005515	TGACTAGATTTCATGCTCGT	No	11	9	7	9	6	4
dme-miR-998-5p	5p	dme-mir-998	MI0005860	CUGAAU	22	ACUGAAUUCUCGUGGGUCUGCA	MIMAT0020898	ACTGAATTCTCGTGGGTC	No	18	10	5	19	10	9
dme-miR-998-3p	3p	dme-mir-998	MI0005860	AGCACC	21	UAGCACCAUGAGAUUCAGCUC	MIMAT0005518	TAGCACCATGAGATTCAGCTC	Yes	54	61	79	70	71	44
dme-miR-999-5p	5p	dme-mir-999	MI0005861	CAUAGU	22	ACAUAGUCAUACGGUGAAUGUU	MIMAT0020899	CATAGTCATACGGTGAATGT	No				2
dme-miR-999-3p	3p	dme-mir-999	MI0005861	GUUAAC	22	UGUUAACUGUAAGACUGUGUCU	MIMAT0005519	TGTTAACTGTAAGACTGTGTCT	Yes	38435	51498	59435	44745	56949	49341
dme-miR-9a-5p	5p	dme-mir-9a	MI0000129	CUUUGG	23	UCUUUGGUUAUCUAGCUGUAUGA	MIMAT0000114	TCTTTGGTTATCTAGCTGTAT	No	1486	1554	671	1566	934	1617
dme-miR-9b-5p	5p	dme-mir-9b	MI0000415	CUUUGG	23	UCUUUGGUGAUUUUAGCUGUAUG	MIMAT0000395	TCTTTGGTGATTTTAGCTGTAT	No	103	127	49	104	55	122
dme-miR-9c-5p	5p	dme-mir-9c	MI0000413	CUUUGG	22	UCUUUGGUAUUCUAGCUGUAGA	MIMAT0000392	TCTTTGGTATTCTAGCTGTAG	No	230	271	137	270	186	266
dme-miR-novel-chr2L_2804	3p	dme-mir-novel-chr2L_2804	MYNO41	CUGGCU	20	ACUGGCUCUGGAUCGAGAGG	dme-miR-novel-chr2L_2804	ACTGGCTCTGGATCGAGAGG	Yes	1	4
dme-miR-novel-chr2L_3415	5p	dme-mir-novel-chr2L_3415	MYNO11	ACACCU	22	UACACCUACACACGCACACGCG	dme-miR-novel-chr2L_3415	TACACCTACACACGCACACGCG	Yes	4	2		1	3	2
dme-miR-novel-chr2L_488	5p	dme-mir-novel-chr2L_488	MYNO30	UUGCAG	20	CUUGCAGGGCUGUAGGCUUC	dme-miR-novel-chr2L_488	CTTGCAGGGCTGTAGGCTTC	Yes			3	1		3
dme-miR-novel-chr2R_10147	5p	dme-mir-novel-chr2R_10147	MYNO25	CGCCGU	21	CCGCCGUGACCGUGGCCGCCU	dme-miR-novel-chr2R_10147	CCGCCGTGACCGTGGCCGCCT	Yes	2	4	5	6	2	3
dme-miR-novel-chr2R_10148	3p	dme-mir-novel-chr2R_10148	MYNO4	CGCCGU	21	CCGCCGUGACCGUGGCCGCCU	dme-miR-novel-chr2R_10148	CCGCCGTGACCGTGGCCGCCT	Yes	2	4	5	6	2	3
dme-miR-novel-chr2R_5321	3p	dme-mir-novel-chr2R_5321	MYNO48	UCGCGU	18	AUCGCGUGGUGUUGGCCC	dme-miR-novel-chr2R_5321	CGCGTGTTGTTGGCCC	No			2
dme-miR-novel-chr2R_5478	5p	dme-mir-novel-chr2R_5478	MYNO2	UUCGUG	18	UUUCGUGAUGAAUGACCC	dme-miR-novel-chr2R_5478	TTTCGTGATGAATGACCC	Yes	31	83	122	137	112	57
dme-miR-novel-chr2R_6579	3p	dme-mir-novel-chr2R_6579	MYNO16	GUGUGG	18	UGUGUGGACCGUGCGAGC	dme-miR-novel-chr2R_6579	TGTGTGGACCGTGCGAGC	Yes				1
dme-miR-novel-chr2R_6689	3p	dme-mir-novel-chr2R_6689	MYNO34	GUUGCG	18	CGUUGCGAAGCGGACGCU	dme-miR-novel-chr2R_6689	CGTTGCGAAGCGGACGCT	Yes	1	2	11	5	7	3
dme-miR-novel-chr2R_7065	3p	dme-mir-novel-chr2R_7065	MYNO47	AUGAAG	20	GAUGAAGAUCCUGACCGAGC	dme-miR-novel-chr2R_7065	GATGAAGATCCTGACCGAGC	Yes		2		4	3	2
dme-miR-novel-chr2R_7339	3p	dme-mir-novel-chr2R_7339	MYNO37	CACCAG	18	GCACCAGCUGUGGAGCCU	dme-miR-novel-chr2R_7339	GCACCAGCTGTGGAGCCT	Yes			3	5	7	2
dme-miR-novel-chr2R_9552	3p	dme-mir-novel-chr2R_9552	MYNO26	ACAUCG	21	CACAUCGAUGUUUUUCCACCU	dme-miR-novel-chr2R_9552	CACATCGATGTTTTTCCACCT	Yes				1	2
dme-miR-novel-chr2R_9660	5p	dme-mir-novel-chr2R_9660	MYNO10	GGCCCA	20	UGGCCCAGAUCAUCGGAAAU	dme-miR-novel-chr2R_9660	TGGCCCAGATCATCGGAAAT	Yes			2	2
dme-miR-novel-chr3L_11500	5p	dme-mir-novel-chr3L_11500	MYNO12	CAGCGG	23	ACAGCGGGGUCGUCACCCUUGGC	dme-miR-novel-chr3L_11500	ACAGCGGGGTCGTCATCCTTGGC	No				1
dme-miR-novel-chr3L_13119	5p	dme-mir-novel-chr3L_13119	MYNO8	UGAAGA	18	AUGAAGAAGAUCGAGGAC	dme-miR-novel-chr3L_13119	ATGAAGAAGATCGAGGAC	Yes	1	5	9	16	6	3
dme-miR-novel-chr3L_14313	5p	dme-mir-novel-chr3L_14313	MYNO50	CAGUGG	18	GCAGUGGGAGUGGUUGCC	dme-miR-novel-chr3L_14313	GCAGTGGGAGTGGTTGCC	Yes		2
dme-miR-novel-chr3L_14484	3p	dme-mir-novel-chr3L_14484	MYNO9	UUGUGG	23	AUUGUGGUGCGCCUCAGUGGAAC	dme-miR-novel-chr3L_14484	ATTGTGGTGCGCCTCAGTGGAAC	Yes		6		7	6	5
dme-miR-novel-chr3L_14505	5p	dme-mir-novel-chr3L_14505	MYNO5	AGAUGG	18	AAGAUGGAUGUGGCGAAC	dme-miR-novel-chr3L_14505	AAGATGGATGTGGCGAAC	Yes	5	13	11	5	11	6
dme-miR-novel-chr3R_15509	3p	dme-mir-novel-chr3R_15509	MYNO3	CUGUCA	19	ACUGUCAUCUGAGCUCUGG	dme-miR-novel-chr3R_15509	ACTGTCATCTGAGCTCTGG	Yes	22	28	20	28	19	13
dme-miR-novel-chr3R_15809	3p	dme-mir-novel-chr3R_15809	MYNO55	CAGUCG	17	UCAGUCGGUAGAGCAUU	dme-miR-novel-chr3R_15809	CAGTCGGTAGAGCATG	No	5	5	12	12	11	5
dme-miR-novel-chr3R_16646	5p	dme-mir-novel-chr3R_16646	MYNO52	AGGUUU	22	AAGGUUUUGUCGAACUUCGAUC	dme-miR-novel-chr3R_16646	AAGGTTTTGTCGAACTTCGATC	Yes	5	11	2	7	7	8
dme-miR-novel-chr3R_17005	3p	dme-mir-novel-chr3R_17005	MYNO44	GGGAUG	21	GGGGAUGUAGCUCAGAUGGUA	dme-miR-novel-chr3R_17005	GGGGATGTAGCTCAGATGGTA	Yes	754	655	883	1176	819	903
dme-miR-novel-chr3R_17939	3p	dme-mir-novel-chr3R_17939	MYNO20	UUGUAG	23	GUUGUAGGUUUCGCAUUUCUGAU	dme-miR-novel-chr3R_17939	GTTGTAGGTTTCGCATTTCTGAT	Yes	4	9	2	4		2
dme-miR-novel-chr3R_18150	5p	dme-mir-novel-chr3R_18150	MYNO56	CUGAAG	19	ACUGAAGGACAUGGGCUCC	dme-miR-novel-chr3R_18150	ACTGAAGGACATGGGCTCC	Yes		2	5	3	4
dme-miR-novel-chr3R_18881	5p	dme-mir-novel-chr3R_18881	MYNO32	CAGCGA	25	ACAGCGAGAAGAUCAACGGUAUGGA	dme-miR-novel-chr3R_18881	ACAGCGAGAAGATCAACGGTATGGA	Yes				2
dme-miR-novel-chr3R_20552	3p	dme-mir-novel-chr3R_20552	MYNO35	CUGGAC	17	UCUGGACGUGAAUGUGU	dme-miR-novel-chr3R_20552	TCTGGACGTGAATGTGT	Yes	3	6	8	4	8	3
dme-miR-novel-chrUextra_22950	3p	dme-mir-novel-chrUextra_22950	MYNO57	AUGUAU	23	UAUGUAUGUAAGCGUAUUACCGG	dme-miR-novel-chrUextra_22950	TATGTATGTAAGCGTATTACCGG	Yes	203	309	115	562	165	317
dme-miR-novel-chrUextra_22967	3p	dme-mir-novel-chrUextra_22967	MYNO1	GCGUGU	17	CGCGUGUUGUUGGCCUC	dme-miR-novel-chrUextra_22967	CCGCGTGTTGTTGGCCT	No	1	2	5	4	5	3
dme-miR-novel-chrX_24303	3p	dme-mir-novel-chrX_24303	MYNO7	CGGUGA	18	CCGGUGAUGCGACAGGCC	dme-miR-novel-chrX_24303	CCGGTGATGCGACAGGCC	Yes	18	13	16	10	20	22
dme-miR-novel-chrX_24917	3p	dme-mir-novel-chrX_24917	MYNO17	CGGGUU	20	ACGGGUUGUCAAUGUGGGCC	dme-miR-novel-chrX_24917	CCACGGGTTGTCAATGTGGGT	No				2
dme-miR-novel-chrX_25245	3p	dme-mir-novel-chrX_25245	MYNO31	AUUUGC	20	GAUUUGCUUGGAGGCUUCGG	dme-miR-novel-chrX_25245	GATTTGCTTGGAGGCTTCGG	Yes				4	4	2
dme-miR-novel-chrX_26419	5p	dme-mir-novel-chrX_26419	MYNO46	CGAGGU	17	GCGAGGUGAUCCUCGAC	dme-miR-novel-chrX_26419	GCGCGAGGTGATCCT	No				1
dme-miR-novel-chrX_26716	3p	dme-mir-novel-chrX_26716	MYNO6	AAAUGU	20	AAAAUGUUGGGCGGCACGAA	dme-miR-novel-chrX_26716	GTTGGGCGGCACGAA	No	10	9	16	12	14	13
