# Supplementary material for: High Throughput Sequencing Identifies MicroRNAs Mediating α-Synuclein Toxicity by Targeting Neuroactive-Ligand Receptor Interaction Pathway in Early Stage of Drosophila Parkinson's Disease Model
Source: PLoS One. 2015 Sep 11;10(9):e0137432. doi: 10.1371/journal.pone.0137432 (PMC4567341; doi:10.1371/journal.pone.0137432)
Supplement: S5 Table — (XLS) [file pone.0137432.s010.xls]

## Sheet: EXP vs CTL.up
Differentially expressed miRNA for EXP vs CTL based on TagCount_Mature_Alone Fold Change cutoff: 1.2 P-value cutoff: 0.05 Column A: MATURE-ID, the ID of mature miRNA annotated in miRBase 21. Column B: pre-miRNA arm (5p or 3p), the position of the most abundant isomiR on pre-miRNA. Column C: PRE-ID, the pre-miRNA name. Column D: PRE-ACC, the pre-miRNA ACCESSION. Column E: MUTURE-SEED, the seed seq…
EXP vs CTL 1.2 fold change UP-regulated miRNAs
miRNA information										TagCount_Mature_Alone						EXP_mean	CTL_mean	EXP vs CTL Fold Change	EXP vs CTL P-value
MATURE-ID	pre-miRNA arm (5p or 3p)	PRE-ID	PRE-ACC	MATURE-SEED	MATURE-LENGTH	MATURE-SEQ	MATURE-ACC	Most_Abundant_Seq	Is_miRBaseMature_Most_Abundant_Seq	11-7PD	1130PD	12-1PD	11-7Dui	1130Dui	12-1Dui	EXP	CTL	EXP vs CTL Fold change	EXP vs CTL P-value
dme-miR-1008-5p	5p	dme-mir-1008	MI0005869	UAAAUA	21	GUAAAUAUCUAAAGUUGAACU	MIMAT0032028	GTAAATATCTAAAGTTGAACT	Yes	6	4	3	3	2		14.3333	11.6667	1.22857	0.0152681
dme-miR-133-3p	3p	dme-mir-133	MI0000362	UGGUCC	22	UUGGUCCCCUUCAACCAGCUGU	MIMAT0000340	TTGGTCCCCTTCAACCAGCTG	No	7117	5446	6415	5549	4259	4772	6336	4870	1.30103	0.00914592
dme-miR-137-3p	3p	dme-mir-137	MI0005849	AUUGCU	22	UAUUGCUUGAGAAUACACGUAG	MIMAT0005507	TATTGCTTGAGAATACACGTAG	Yes	181	149	175	150	99	147	178.333	142	1.25587	0.0341114
dme-miR-13b-3p	3p	dme-mir-13b-1	MI0000134	AUCACA	22	UAUCACAGCCAUUUUGACGAGU	MIMAT0000119	TATCACAGCCATTTTGACGAGT	Yes	78	62	72	48	34	50	80.6667	54	1.49383	0.0080273
dme-miR-13b-3p	3p	dme-mir-13b-2	MI0000135	AUCACA	22	UAUCACAGCCAUUUUGACGAGU	MIMAT0000119	TATCACAGCCATTTTGACGAGT	Yes	78	62	72	48	34	50	80.6667	54	1.49383	0.0080273
dme-miR-932-5p	5p	dme-mir-932	MI0005820	CAAUUC	22	UCAAUUCCGUAGUGCAUUGCAG	MIMAT0005479	TCAATTCCGTAGTGCATTGCAGT	No	14	9	10	10	5	4	21	16.3333	1.28571	0.0198039

## Sheet: EXP vs CTL.dn
Differentially expressed miRNA for EXP vs CTL based on TagCount_Mature_Alone Fold Change cutoff: 0.83(1/1.2) P-value cutoff: 0.05 Column A: MATURE-ID, the ID of mature miRNA annotated in miRBase 21. Column B: pre-miRNA arm (5p or 3p), the position of the most abundant isomiR on pre-miRNA. Column C: PRE-ID, the pre-miRNA name. Column D: PRE-ACC, the pre-miRNA ACCESSION. Column E: MUTURE-SEED, the …
EXP vs CTL 1.2 fold change down-regulated miRNAs
miRNA information										TagCount_Mature_Alone						EXP_mean	CTL_mean	EXP vs CTL Fold Change	EXP vs CTL P-value
MATURE-ID	pre-miRNA arm (5p or 3p)	PRE-ID	PRE-ACC	MATURE-SEED	MATURE-LENGTH	MATURE-SEQ	MATURE-ACC	Most_Abundant_Seq	Is_miRBaseMature_Most_Abundant_Seq	11-7PD	1130PD	12-1PD	11-7Dui	1130Dui	12-1Dui	EXP	CTL	EXP vs CTL Fold change	EXP vs CTL P-value
