# Supplementary material for: High Throughput Sequencing Identifies MicroRNAs Mediating α-Synuclein Toxicity by Targeting Neuroactive-Ligand Receptor Interaction Pathway in Early Stage of Drosophila Parkinson's Disease Model
Source: PLoS One. 2015 Sep 11;10(9):e0137432. doi: 10.1371/journal.pone.0137432 (PMC4567341; doi:10.1371/journal.pone.0137432)
Supplement: S7 Table — (XLSX) [file pone.0137432.s012.xlsx]

## Sheet: chart_9B36834E56541429514912125
Category	Term	name	percentage of genes (%)	PValue	Genes	List Total	Pop Hits	Pop Total	Fold Enrichment	Bonferroni	Benjamini	FDR
GOTERM_BP_FAT	GO:0009791	post-embryonic development	6.30487	2.14e-19	34170, 34009, 44205, 33759, 35653, 43481, 34007, 36171, 36571, 40009, 45922, 36952, 40999, 38433, 34277, 46156, 45285, 45280, 37415, 31162, 41958, 39962, 37089, 38961, 37949, 44540, 36773, 39259, 32162, 3772082, 37010, 44747, 41749, 42871, 30998, 41137, 53560, 41944, 41273, 43795, 36118, 41458, 31405, 37973, 36390, 37335, 43598, 33219, 40314, 40605, 42034, 41140, 31535, 44027, 39999, 39441, 39440…	1475	434	7937	1.95899	6.13e-16	6.13e-16	3.83e-16
GOTERM_BP_FAT	GO:0002165	instar larval or pupal development	6.10535	4.8e-19	34170, 34009, 44205, 33759, 35653, 43481, 34007, 36171, 36571, 40009, 45922, 36952, 40999, 38433, 46156, 45285, 45280, 37415, 31162, 41958, 39962, 37089, 38961, 37949, 44540, 36773, 39259, 32162, 3772082, 37010, 44747, 41749, 42871, 30998, 41137, 53560, 41273, 43795, 36118, 41458, 31405, 37973, 36390, 37335, 43598, 33219, 40314, 40605, 42034, 41140, 31535, 44027, 39999, 39441, 39440, 39711, 36421…	1475	418	7937	1.96961	1.38e-15	6.89e-16	8.6e-16
GOTERM_BP_FAT	GO:0030182	neuron differentiation	5.98563	9.07e-19	34939, 43402, 37216, 44205, 40330, 37007, 40141, 36952, 33343, 31843, 39765, 43825, 34277, 42300, 44096, 41852, 36382, 38065, 34947, 36384, 44540, 47998, 34945, 3772082, 44548, 34413, 41840, 43832, 42025, 44747, 35933, 44748, 34519, 47080, 42871, 42501, 33059, 33496, 36041, 41273, 31309, 32850, 33770, 36390, 33218, 32746, 43651, 41140, 39443, 38863, 44027, 43162, 35097, 43469, 39366, 48071, 35523…	1475	409	7937	1.97348	2.6e-15	8.68e-16	1.63e-15
GOTERM_BP_FAT	GO:0009886	post-embryonic morphogenesis	5.34717	2.98e-18	34170, 34009, 44205, 33759, 35653, 43481, 34007, 36171, 36571, 40009, 45922, 36952, 40999, 46156, 45285, 45280, 41958, 39962, 37089, 38961, 37949, 44540, 36773, 39259, 32162, 3772082, 44747, 41749, 30998, 41137, 53560, 41273, 43795, 36118, 41458, 37973, 31405, 43598, 33219, 40314, 40605, 42034, 41140, 31535, 44027, 39999, 39441, 39440, 39711, 36421, 40014, 42596, 32536, 35662, 39173, 33379, 37751…	1475	353	7937	2.04265	8.54e-15	2.14e-15	5.33e-15
GOTERM_BP_FAT	GO:0048707	instar larval or pupal morphogenesis	5.22745	1.25e-17	34170, 34009, 44205, 33759, 35653, 43481, 34007, 36171, 36571, 40009, 45922, 36952, 40999, 46156, 45285, 45280, 41958, 39962, 37089, 38961, 37949, 44540, 36773, 39259, 32162, 3772082, 44747, 41749, 30998, 41137, 53560, 41273, 43795, 36118, 41458, 37973, 31405, 43598, 33219, 40314, 40605, 42034, 41140, 31535, 44027, 39999, 39441, 39440, 39711, 36421, 42596, 32536, 35662, 39173, 33379, 37751, 39596…	1475	347	7937	2.03145	3.6e-14	7.2e-15	2.25e-14
GOTERM_BP_FAT	GO:0000902	cell morphogenesis	6.14525	6.49e-17	34939, 41666, 43402, 37216, 34009, 44205, 40330, 34007, 37007, 40141, 33343, 31843, 39765, 43825, 35922, 34277, 42300, 39387, 31659, 44096, 41852, 47594, 37089, 36382, 38065, 34947, 38961, 36384, 44540, 47998, 34945, 36773, 41673, 3772082, 44548, 41840, 40517, 43832, 33946, 42025, 44747, 35933, 44748, 34519, 53569, 47080, 31023, 42871, 40714, 42504, 32752, 33059, 36041, 31309, 33770, 36390, 36592…	1475	442	7937	1.87483	3.19e-13	5.31e-14	2e-13
GOTERM_BP_FAT	GO:0007552	metamorphosis	5.30726	9.06e-17	34170, 34009, 44205, 33759, 35653, 43481, 34007, 36171, 36571, 40009, 45922, 36952, 40999, 38433, 46156, 45285, 45280, 31162, 41958, 39962, 37089, 38961, 37949, 44540, 36773, 39259, 32162, 3772082, 44747, 41749, 30998, 41137, 53560, 41273, 43795, 36118, 41458, 37973, 31405, 43598, 33219, 40314, 40605, 42034, 41140, 31535, 44027, 39999, 39441, 39440, 39711, 36421, 42596, 32536, 35662, 39173, 33379…	1475	362	7937	1.977	3.19e-13	4.55e-14	2e-13
GOTERM_BP_FAT	GO:0032989	cellular component morphogenesis	6.86353	2.68e-16	34939, 41666, 43402, 37216, 34009, 44205, 40330, 34007, 37007, 40141, 33343, 31843, 39765, 43825, 35922, 34277, 42300, 39387, 31659, 44096, 41852, 47594, 37089, 36382, 38065, 34947, 38961, 36384, 44540, 47998, 34945, 36773, 41673, 3772082, 44548, 41840, 40517, 43832, 33946, 42025, 44747, 35933, 44748, 34519, 31023, 47080, 53569, 42871, 40714, 42504, 32752, 33059, 53560, 36041, 31309, 33770, 36390…	1475	518	7937	1.78675	6.37e-13	7.97e-14	4e-13
GOTERM_BP_FAT	GO:0048666	neuron development	5.06784	1.13e-15	34939, 43402, 37216, 44205, 40330, 37007, 40141, 33343, 31843, 39765, 43825, 34277, 42300, 44096, 41852, 36382, 38065, 34947, 36384, 44540, 34945, 44548, 41840, 43832, 42025, 44747, 35933, 44748, 34519, 47080, 42871, 42501, 33059, 33496, 36041, 31309, 32850, 33770, 36390, 32746, 39443, 38863, 44027, 43162, 35097, 43469, 39366, 48071, 35523, 38327, 44522, 37066, 36125, 38469, 48317, 40090, 41718, …	1475	347	7937	1.96942	3.19e-12	3.54e-13	1.99e-12
GOTERM_BP_FAT	GO:0007242	intracellular signaling cascade	4.46927	6.17e-15	37191, 37219, 32976, 38232, 53471, 53472, 36952, 43823, 32760, 31162, 41957, 41677, 47594, 31945, 47998, 32551, 34803, 5740362, 36776, 47384, 3772082, 34689, 37010, 41743, 40073, 44747, 42504, 42501, 117503, 39965, 3885573, 32999, 31309, 41927, 36390, 3355134, 32442, 44172, 35738, 43651, 41140, 35940, 32920, 36699, 43982, 33014, 33025, 42656, 4379885, 34924, 40224, 33204, 32631, 48311, 41726, 316…	1475	297	7937	2.02921	1.78e-11	1.79e-12	1.11e-11
GOTERM_BP_FAT	GO:0048569	post-embryonic organ development	4.46927	6.17e-15	34009, 44205, 35653, 43481, 33759, 34007, 36171, 36571, 40009, 45922, 36952, 40999, 34277, 46156, 45285, 45280, 41958, 37089, 37949, 38961, 44540, 36773, 39259, 32162, 3772082, 44747, 41749, 30998, 53560, 41944, 41273, 36118, 43795, 37973, 31405, 41458, 40314, 40605, 42034, 41140, 31535, 44027, 39441, 39440, 36421, 42596, 32536, 35662, 33379, 39596, 31665, 31667, 44289, 42313, 31738, 38091, 40660…	1475	297	7937	2.02921	1.78e-11	1.79e-12	1.11e-11
GOTERM_BP_FAT	GO:0045165	cell fate commitment	3.751	7.65e-15	43402, 34009, 44205, 38091, 32976, 42445, 42541, 37355, 41066, 34569, 43825, 32083, 34277, 45285, 37417, 43769, 35509, 41363, 47594, 43862, 44543, 44505, 38065, 34982, 43158, 39536, 47998, 35881, 44540, 40031, 41673, 33225, 42737, 3772082, 39439, 34413, 44786, 50281, 44747, 39572, 47763, 53569, 42501, 33059, 41944, 41273, 36606, 44843, 37230, 33770, 44849, 36059, 40314, 35110, 32273, 37889, 43651…	1475	232	7937	2.18024	2.2e-11	2e-12	1.37e-11
GOTERM_BP_FAT	GO:0031175	neuron projection development	4.34956	8.48e-15	34939, 43402, 37216, 44205, 40330, 37007, 40141, 33343, 31843, 39765, 43825, 34277, 42300, 44096, 41852, 36382, 38065, 34947, 36384, 44540, 34945, 44548, 41840, 43832, 42025, 35933, 44748, 34519, 47080, 42871, 33059, 36041, 31309, 33770, 36390, 32746, 39443, 43162, 44027, 38863, 35097, 43469, 48071, 35523, 38327, 44522, 37066, 36125, 38469, 48317, 40090, 41718, 31290, 37528, 31002, 39596, 41861, …	1475	287	7937	2.04366	2.42e-11	2.02e-12	1.51e-11
GOTERM_BP_FAT	GO:0007560	imaginal disc morphogenesis	4.30966	1.04e-14	34009, 44205, 35653, 43481, 33759, 34007, 36171, 36571, 40009, 45922, 36952, 40999, 46156, 45285, 45280, 41958, 37089, 37949, 38961, 44540, 36773, 39259, 32162, 3772082, 44747, 41749, 30998, 53560, 41273, 36118, 43795, 37973, 31405, 41458, 40314, 40605, 42034, 41140, 31535, 44027, 39441, 39440, 36421, 42596, 32536, 35662, 33379, 39596, 31665, 31667, 44289, 42313, 31738, 38091, 40660, 32718, 49638…	1475	284	7937	2.0463	2.96e-11	2.28e-12	1.85e-11
GOTERM_BP_FAT	GO:0048563	post-embryonic organ morphogenesis	4.30966	1.04e-14	34009, 44205, 35653, 43481, 33759, 34007, 36171, 36571, 40009, 45922, 36952, 40999, 46156, 45285, 45280, 41958, 37089, 37949, 38961, 44540, 36773, 39259, 32162, 3772082, 44747, 41749, 30998, 53560, 41273, 36118, 43795, 37973, 31405, 41458, 40314, 40605, 42034, 41140, 31535, 44027, 39441, 39440, 36421, 42596, 32536, 35662, 33379, 39596, 31665, 31667, 44289, 42313, 31738, 38091, 40660, 32718, 49638…	1475	284	7937	2.0463	2.96e-11	2.28e-12	1.85e-11
GOTERM_BP_FAT	GO:0048667	cell morphogenesis involved in neuron differentiation	4.34956	1.12e-14	34939, 43402, 37216, 44205, 40330, 37007, 40141, 33343, 31843, 39765, 43825, 34277, 42300, 44096, 41852, 36382, 38065, 34947, 36384, 44540, 34945, 44548, 41840, 43832, 42025, 35933, 44748, 34519, 47080, 42871, 33059, 36041, 31309, 33770, 36390, 32746, 39443, 43162, 44027, 38863, 35097, 43469, 48071, 35523, 38327, 44522, 37066, 36125, 38469, 48317, 40090, 41718, 31290, 37528, 39596, 41861, 39842, …	1475	288	7937	2.03657	3.22e-11	2.3e-12	2.01e-11
GOTERM_BP_FAT	GO:0000904	cell morphogenesis involved in differentiation	4.50918	1.13e-14	34939, 43402, 37216, 44205, 40330, 37007, 40141, 33343, 31843, 39765, 43825, 34277, 42300, 44096, 41852, 36382, 38065, 34947, 36384, 44540, 34945, 44548, 41840, 43832, 42025, 35933, 44748, 34519, 47080, 40714, 42504, 42871, 33059, 36041, 31309, 33770, 36390, 32746, 39443, 38863, 43162, 44027, 35097, 43469, 48071, 35523, 38327, 44522, 37066, 36125, 38469, 48317, 40090, 41718, 31290, 37528, 39596, …	1475	303	7937	2.00678	3.25e-11	2.17e-12	2.03e-11
GOTERM_BP_FAT	GO:0048812	neuron projection morphogenesis	4.30966	1.8e-14	34939, 43402, 37216, 44205, 40330, 37007, 40141, 33343, 31843, 39765, 43825, 34277, 42300, 44096, 41852, 36382, 38065, 34947, 36384, 44540, 34945, 44548, 41840, 43832, 42025, 35933, 44748, 34519, 47080, 42871, 33059, 36041, 31309, 33770, 36390, 32746, 39443, 43162, 44027, 38863, 35097, 43469, 48071, 35523, 38327, 44522, 37066, 36125, 38469, 48317, 40090, 41718, 31290, 37528, 31002, 39596, 41861, …	1475	286	7937	2.03199	5.16e-11	3.23e-12	3.22e-11
GOTERM_BP_FAT	GO:0007444	imaginal disc development	5.58659	3.28e-14	34009, 44205, 33759, 35653, 43481, 34007, 36171, 36571, 40009, 45922, 36952, 40999, 46156, 45285, 45280, 41958, 37089, 38961, 37949, 44540, 36773, 39259, 32162, 3772082, 44747, 39572, 41749, 43528, 45325, 42871, 30998, 41137, 53560, 33496, 41273, 43795, 36118, 46085, 41458, 31405, 37973, 40314, 33218, 38451, 40605, 43651, 42034, 41140, 34495, 31535, 44027, 39441, 39440, 36421, 42596, 32536, 35662…	1475	412	7937	1.8285	9.4e-11	5.53e-12	5.87e-11
GOTERM_BP_FAT	GO:0006928	cell motion	4.38947	3.54e-13	34939, 41666, 44205, 32976, 40330, 34007, 32876, 37007, 45922, 33890, 31843, 49701, 45928, 34277, 41957, 36614, 42162, 34946, 34947, 36384, 38961, 34945, 3772082, 44548, 41840, 43832, 42025, 44748, 41749, 38736, 47080, 42504, 42871, 32752, 33059, 36041, 35939, 41944, 44274, 33770, 36592, 32746, 40605, 41140, 49228, 39443, 44027, 35097, 43469, 38976, 44522, 37066, 42596, 36125, 35662, 40090, 37528…	1475	305	7937	1.94069	1.02e-09	5.64e-11	6.34e-10
GOTERM_CC_FAT	GO:0005886	plasma membrane	9.33759	1.11e-12	38056, 37191, 32976, 38545, 31425, 34222, 36952, 31843, 40424, 41957, 326160, 41958, 37089, 34946, 32987, 36589, 40517, 49968, 43528, 33941, 46085, 44227, 36413, 40129, 37277, 42920, 37979, 36592, 41247, 31204, 326189, 41140, 38978, 44129, 38863, 31017, 36699, 35097, 43469, 38976, 31201, 44522, 37066, 36125, 34013, 44219, 34826, 31002, 33473, 246538, 34049, 43974, 40049, 31071, 31601, 34046, 3850…	967	781	4786	1.4829	6.29e-10	6.29e-10	1.62e-09
GOTERM_CC_FAT	GO:0044459	plasma membrane part	5.50678	1.12e-11	32425, 37191, 3355118, 31955, 32976, 38545, 42307, 32901, 32158, 40424, 39387, 42017, 326160, 47594, 34946, 36384, 42473, 36773, 39054, 39861, 40517, 49968, 43528, 42027, 42871, 32752, 33941, 31646, 39062, 39063, 33211, 37129, 40129, 35215, 33219, 42920, 36592, 33218, 41247, 32746, 31204, 41140, 41870, 3355131, 38978, 50060, 31017, 35097, 43982, 38976, 31201, 36125, 32340, 32537, 34013, 34826, 44…	967	405	4786	1.68644	6.39e-09	3.19e-09	1.65e-08
GOTERM_CC_FAT	GO:0030054	cell junction	2.03512	2.5e-06	42549, 38545, 36670, 40665, 32901, 41426, 32083, 39387, 45382, 47594, 36145, 42473, 39054, 40517, 49968, 36084, 42871, 36080, 32752, 33941, 31646, 31816, 37233, 42896, 43892, 45910, 35215, 44885, 34304, 33062, 42920, 41185, 33218, 36592, 41247, 38978, 50060, 35097, 43806, 31201, 37892, 34013, 34826, 36460, 32631, 33473, 4379834, 43852, 46187, 36363, 42313	967	134	4786	1.8837	0.00141902	0.000473	0.00365906
GOTERM_CC_FAT	GO:0031224	intrinsic to membrane	13.4078	6.58e-06	38056, 38133, 34009, 37191, 32976, 33897, 38545, 33540, 32970, 36236, 34222, 31843, 41126, 43636, 44006, 3772232, 326160, 41958, 32694, 37089, 34946, 38635, 40139, 39106, 36582, 38445, 38446, 33556, 36589, 44747, 40510, 39307, 38736, 64877, 43528, 31023, 40412, 38836, 30998, 46059, 36413, 40020, 40129, 33568, 32992, 37277, 41640, 32858, 31408, 42920, 37979, 250736, 33167, 31204, 44126, 33465, 350…	967	1382	4786	1.20331	0.00373549	0.000935	0.00964318
GOTERM_CC_FAT	GO:0031226	intrinsic to plasma membrane	2.67358	1.13e-05	42549, 34049, 38028, 40049, 34046, 37191, 38504, 31955, 319016, 38545, 40665, 41379, 32849, 41426, 42307, 37040, 39387, 42017, 42940, 40464, 36331, 326160, 34946, 33599, 36145, 40861, 41638, 37843, 43669, 43528, 42027, 36006, 43222, 45368, 39062, 39063, 37129, 40129, 45910, 37603, 44885, 34304, 39409, 33219, 42920, 32406, 32275, 31204, 32780, 43803, 31017, 43982, 35900, 38976, 38168, 31457, 36125…	967	201	4786	1.64978	0.00643657	0.00129064	0.016638
GOTERM_CC_FAT	GO:0005887	integral to plasma membrane	2.63368	1.34e-05	42549, 34049, 38028, 40049, 34046, 37191, 38504, 31955, 319016, 38545, 40665, 41379, 32849, 41426, 42307, 37040, 39387, 42017, 42940, 40464, 36331, 326160, 34946, 33599, 36145, 40861, 41638, 37843, 43669, 43528, 42027, 36006, 43222, 39062, 39063, 37129, 40129, 45910, 37603, 44885, 34304, 39409, 33219, 32406, 42920, 32275, 31204, 32780, 43803, 31017, 43982, 35900, 38976, 38168, 31457, 36125, 32340…	967	198	4786	1.64978	0.0075701	0.00126568	0.0195789
GOTERM_CC_FAT	GO:0045177	apical part of cell	0.957702	1.37e-05	37065, 42896, 47594, 34950, 41363, 32976, 44839, 37355, 35801, 40861, 37929, 35378, 33218, 36952, 31290, 33638, 32158, 39750, 32083, 38491, 53569, 42871, 43852, 32752	967	48	4786	2.47466	0.00779192	0.00111687	0.0201548
GOTERM_CC_FAT	GO:0016021	integral to membrane	13.0487	2.87e-05	38056, 38133, 37191, 32976, 33897, 38545, 33540, 32970, 36236, 34222, 31843, 41126, 43636, 44006, 3772232, 326160, 41958, 32694, 37089, 34946, 38635, 40139, 39106, 36582, 38445, 38446, 33556, 36589, 44747, 40510, 39307, 38736, 43528, 31023, 40412, 38836, 30998, 46059, 36413, 40020, 40129, 33568, 32992, 37277, 41640, 32858, 31408, 42920, 37979, 250736, 33167, 31204, 44126, 33465, 35097, 31722, 310…	967	1360	4786	1.19002	0.0162096	0.00204071	0.0421021
GOTERM_CC_FAT	GO:0005768	endosome	0.678372	9.33e-05	33196, 34009, 38635, 5740362, 34778, 40090, 33161, 42841, 44263, 45307, 42367, 44279, 37033, 45380, 36699, 42501, 32947	967	31	4786	2.71415	0.0516877	0.00587947	0.136661
GOTERM_CC_FAT	GO:0016327	apicolateral plasma membrane	0.798085	0.000596	42896, 47594, 32976, 34013, 41185, 33218, 36592, 32746, 40517, 38418, 32083, 42871, 32752, 39387, 50060, 46187, 35097, 36363, 42313, 31816	967	45	4786	2.1997	0.287624	0.0333463	0.870113
GOTERM_CC_FAT	GO:0016323	basolateral plasma membrane	0.558659	0.000638	37233, 34950, 35215, 38622, 36773, 44885, 40517, 32158, 36084, 32083, 38978, 35097, 33941, 31201	967	26	4786	2.66502	0.304445	0.0324655	0.931134
GOTERM_MF_FAT	GO:0030528	transcription regulator activity	8.06065	8.07e-11	44205, 33759, 36571, 33343, 37492, 46156, 45285, 40429, 40428, 44544, 43156, 38065, 43158, 44540, 40790, 40693, 3772082, 44548, 34413, 41942, 33059, 43150, 33496, 41944, 41273, 43795, 33770, 37973, 38258, 38451, 43651, 43656, 43162, 44027, 44029, 36421, 43900, 43782, 38045, 38469, 31310, 34625, 42092, 44018, 31738, 33183, 38091, 39212, 43383, 49638, 34560, 40045, 36678, 41709, 34569, 41228, 43769…	1558	682	7918	1.50527	9.74e-08	9.74e-08	1.3e-07
GOTERM_MF_FAT	GO:0003700	transcription factor activity	4.94812	6.27e-09	36372, 37216, 33759, 36171, 36571, 39569, 33343, 39765, 43825, 34277, 42300, 36032, 45285, 40428, 31162, 39962, 44544, 36382, 43156, 38065, 43158, 44540, 47285, 40693, 3772082, 34413, 39252, 35843, 32757, 47080, 53560, 43150, 33059, 33496, 41944, 41273, 44272, 43795, 33770, 44849, 37973, 38451, 40605, 42034, 43844, 43656, 44027, 39999, 34992, 39441, 39440, 43900, 43782, 32536, 38469, 31310, 44839…	1558	389	7918	1.62002	7.58e-06	3.79e-06	1.01e-05
GOTERM_MF_FAT	GO:0003677	DNA binding	8.89864	9.69e-08	31420, 33759, 36571, 33343, 33341, 46156, 45285, 40428, 38958, 34311, 44544, 43156, 38065, 43158, 44540, 40790, 40693, 3772082, 44548, 34413, 36241, 36825, 41942, 3772329, 3771845, 33059, 43150, 33496, 41944, 41273, 43796, 43795, 36118, 33770, 37973, 33565, 35686, 38451, 43656, 36110, 44027, 43162, 31722, 318846, 117419, 36421, 43900, 47121, 43782, 38469, 31310, 36945, 44018, 31738, 33185, 38093,…	1558	830	7918	1.36545	0.000117	3.9e-05	0.000157
GOTERM_MF_FAT	GO:0000166	nucleotide binding	11.8117	4.95e-06	43936, 41666, 38649, 44205, 38135, 33540, 40143, 34004, 38433, 31740, 34422, 36579, 36816, 41124, 41957, 34311, 37948, 34803, 5740362, 37080, 41673, 39919, 36582, 40131, 39309, 39307, 31023, 42501, 33059, 33498, 31308, 37075, 41927, 43794, 43165, 32992, 38526, 37070, 35686, 41247, 33165, 43651, 3772218, 41140, 38720, 43467, 36699, 44029, 33025, 43362, 117419, 41919, 40292, 38515, 40673, 43643, 44…	1558	1206	7918	1.24736	0.00596329	0.00149417	0.00801087
GOTERM_MF_FAT	GO:0003702	RNA polymerase II transcription factor activity	3.19234	1.14e-05	33239, 38914, 33759, 42541, 36171, 41168, 34560, 36678, 39765, 34569, 43825, 36278, 36032, 37414, 40429, 34847, 35509, 39962, 41801, 42162, 36382, 38065, 44505, 34982, 40790, 44540, 47285, 32723, 37639, 32724, 35800, 40962, 34844, 3772082, 44548, 45871, 39439, 34413, 44786, 34883, 43398, 40616, 47763, 47080, 41942, 40374, 53560, 33059, 41944, 43795, 2768981, 40832, 38073, 34956, 37973, 36390, 375…	1558	257	7918	1.58199	0.0136302	0.00274103	0.0183803
GOTERM_MF_FAT	GO:0043565	sequence-specific DNA binding	2.8731	2.69e-05	36372, 33183, 33239, 42541, 33759, 42191, 43383, 40045, 36678, 41709, 3355151, 36032, 32943, 45285, 40428, 31162, 35509, 39962, 44544, 37116, 38065, 41988, 44540, 47285, 32723, 32724, 40693, 40962, 3772082, 39439, 42930, 39252, 31470, 48535, 40378, 32757, 47080, 47763, 40374, 3772329, 31813, 37546, 41944, 41273, 43795, 37788, 40832, 37973, 44849, 39406, 35398, 37889, 38451, 42034, 36110, 43656, 3…	1558	230	7918	1.59094	0.0319302	0.00539391	0.0434558
GOTERM_MF_FAT	GO:0008270	zinc ion binding	10.016	4.14e-05	38337, 31420, 32875, 37395, 37190, 42387, 36571, 33343, 34425, 33957, 36232, 41126, 33488, 31746, 40428, 42274, 44544, 38347, 37949, 38961, 40791, 37083, 34803, 5740362, 40693, 44548, 36241, 41135, 36825, 30998, 41944, 31851, 40127, 43795, 36595, 33565, 35687, 33161, 41145, 47718, 38451, 43656, 44027, 38976, 31105, 32295, 41919, 59239, 38327, 36425, 38469, 38468, 43279, 38716, 36945, 38466, 33967…	1558	1026	7918	1.2433	0.0487509	0.00711447	0.0669203
GOTERM_MF_FAT	GO:0046872	metal ion binding	15.842	4.91e-05	43936, 37190, 43481, 40810, 33140, 36571, 33343, 34425, 33957, 36232, 41126, 33488, 40428, 3354863, 40791, 37083, 40693, 33556, 36241, 41135, 41944, 33941, 40127, 40129, 33568, 33361, 36595, 33565, 40029, 42922, 33161, 41145, 41919, 59239, 36425, 36125, 36329, 43279, 33967, 33473, 41250, 33964, 40186, 40660, 40665, 43105, 34560, 40045, 43102, 36678, 34569, 40248, 40180, 39085, 36538, 36540, 33599…	1558	1718	7918	1.1744	0.0576417	0.00739375	0.0794887
GOTERM_MF_FAT	GO:0043167	ion binding	16.1612	0.000112	43936, 37190, 43481, 40810, 33140, 36571, 33343, 34425, 33957, 36232, 40524, 41126, 33488, 40428, 3354863, 40136, 40791, 37083, 40693, 33556, 36241, 41135, 41944, 33941, 40127, 40129, 33568, 33361, 36595, 33565, 40029, 42922, 33161, 41145, 41919, 59239, 36425, 36125, 36329, 43279, 33967, 33473, 41250, 33964, 40186, 40660, 40665, 43105, 34560, 40045, 43102, 36678, 34569, 40248, 40180, 39085, 36538…	1558	1772	7918	1.16155	0.126562	0.0149228	0.181082
GOTERM_MF_FAT	GO:0032555	purine ribonucleotide binding	8.97845	0.000146	38649, 38135, 40143, 33540, 34004, 31740, 38433, 34422, 36579, 41124, 41957, 34311, 34803, 5740362, 37080, 41673, 36582, 40131, 39309, 39307, 42501, 33059, 31308, 37075, 41927, 43794, 43165, 32992, 35686, 41247, 33165, 3772218, 43651, 41140, 36699, 33025, 117419, 40292, 41919, 38515, 43643, 44117, 43647, 35288, 4379919, 33185, 36992, 40660, 41712, 43772, 5740653, 41020, 44817, 33445, 41911, 40249…	1558	923	7918	1.23888	0.161804	0.0174955	0.236131
GOTERM_MF_FAT	GO:0032553	ribonucleotide binding	8.97845	0.000146	38649, 38135, 40143, 33540, 34004, 31740, 38433, 34422, 36579, 41124, 41957, 34311, 34803, 5740362, 37080, 41673, 36582, 40131, 39309, 39307, 42501, 33059, 31308, 37075, 41927, 43794, 43165, 32992, 35686, 41247, 33165, 3772218, 43651, 41140, 36699, 33025, 117419, 40292, 41919, 38515, 43643, 44117, 43647, 35288, 4379919, 33185, 36992, 40660, 41712, 43772, 5740653, 41020, 44817, 33445, 41911, 40249…	1558	923	7918	1.23888	0.161804	0.0174955	0.236131
GOTERM_MF_FAT	GO:0043169	cation binding	16.0415	0.000156	43936, 37190, 43481, 40810, 33140, 36571, 33343, 34425, 33957, 36232, 40524, 41126, 33488, 40428, 3354863, 40791, 37083, 40693, 33556, 36241, 41135, 41944, 33941, 40127, 40129, 33568, 33361, 36595, 33565, 40029, 42922, 33161, 41145, 41919, 59239, 36425, 36125, 36329, 43279, 33967, 33473, 41250, 33964, 40186, 40660, 40665, 43105, 34560, 40045, 43102, 36678, 34569, 40248, 40180, 39085, 36538, 36540…	1558	1764	7918	1.15818	0.171983	0.0170101	0.252455
GOTERM_MF_FAT	GO:0019899	enzyme binding	1.07741	0.000162	42549, 42150, 36372, 37395, 35653, 36670, 53472, 32970, 32256, 36952, 33165, 39588, 35420, 33526, 43041, 32531, 43905, 41367, 36732, 31987, 43434, 35801, 42093, 43730, 44747, 41861, 35742	1558	66	7918	2.07906	0.177825	0.0161845	0.261916
GOTERM_MF_FAT	GO:0003704	specific RNA polymerase II transcription factor activity	1.19713	0.000177	2768981, 42541, 37973, 34560, 41168, 40605, 42034, 34569, 39999, 39440, 39962, 35430, 35509, 44505, 44540, 32536, 32723, 48317, 32724, 35800, 3772082, 45871, 44548, 39439, 34413, 30975, 47763, 42210, 33059, 35341	1558	77	7918	1.98006	0.192583	0.0163204	0.28611
GOTERM_MF_FAT	GO:0046914	transition metal ion binding	12.6097	0.000178	38337, 31420, 32875, 37395, 37190, 43481, 42387, 36571, 33343, 34425, 33957, 38433, 36232, 38746, 41126, 33488, 31746, 40428, 44006, 3354863, 42274, 44544, 38347, 37949, 38961, 40791, 37083, 34803, 5740362, 40693, 44548, 33556, 36241, 43620, 41135, 36825, 42689, 30998, 41944, 31851, 40127, 43795, 33568, 36595, 33565, 32858, 35687, 40029, 33161, 42922, 41145, 47718, 38451, 326189, 326187, 43656, 4…	1558	1354	7918	1.18609	0.193577	0.0152502	0.287755
GOTERM_MF_FAT	GO:0003729	mRNA binding	2.23464	0.000691	41666, 43448, 37254, 37914, 39049, 37146, 40562, 37511, 49809, 35924, 35756, 250811, 44095, 42274, 48571, 43862, 39198, 34946, 37116, 47998, 3772180, 36619, 48535, 34885, 44748, 42689, 38779, 33498, 38173, 40739, 38526, 45840, 37070, 38937, 42460, 31481, 38720, 43467, 44029, 37781, 37065, 53443, 42752, 32603, 39034, 33201, 42596, 40673, 42297, 37757, 37528, 33967, 31835, 43087, 33033, 32009	1558	186	7918	1.53011	0.566178	0.0541533	1.11234
GOTERM_MF_FAT	GO:0030695	GTPase regulator activity	1.79569	0.000802	42150, 5740235, 43974, 39901, 43402, 43892, 37395, 36722, 38930, 32898, 43758, 32088, 42192, 42484, 38051, 32442, 44030, 33165, 40704, 32920, 32686, 36554, 32743, 31105, 36538, 39385, 40179, 37037, 36929, 34803, 40327, 40608, 41960, 31987, 36881, 42665, 42371, 38879, 33263, 41749, 53569, 34032, 34431, 38987, 117503	1558	142	7918	1.61054	0.620411	0.0587454	1.28906
GOTERM_MF_FAT	GO:0003727	single-stranded RNA binding	0.478851	0.000821	42752, 48571, 42285, 32603, 40436, 33201, 37767, 3772180, 39919, 37070, 37914, 38173	1558	21	7918	2.90409	0.629139	0.056679	1.31981
GOTERM_MF_FAT	GO:0008047	enzyme activator activity	1.27694	0.000829	5740235, 37126, 38930, 32898, 43758, 38232, 32088, 36059, 42484, 43978, 31011, 40704, 34616, 32920, 32686, 32743, 36554, 39385, 36538, 37037, 34803, 41960, 31987, 38512, 42371, 33263, 41749, 53569, 34032, 34431, 117503, 38987	1558	91	7918	1.78713	0.632972	0.0541623	1.33354
